# Supplementary material for: European knowledge alliance for innovative measures in prevention of work-related musculoskeletal pain disorders (Prevent4Work Project): protocol for an international mixed-methods longitudinal study
Source: PubMed Central journal article supplement — BMJ Open. 2021 Sep 14;11(9):e052602. doi: 10.1136/bmjopen-2021-052602 (PMC8442076; doi:10.1136/bmjopen-2021-052602), 2021-09-14
Supplement: bmjopen-2021-052602.draft_revisions.pdf [file bmjopen-2021-052602.draft_revisions.pdf]

# BMJ Open

BMJ Open is committed to open peer review. As part of this commitment we make the peer review history of every article we publish publicly available.

When an article is published we post the peer reviewers' comments and the authors' responses online. We also post the versions of the paper that were used during peer review. These are the versions that the peer review comments apply to.

The versions of the paper that follow are the versions that were submitted during the peer review process. They are not the versions of record or the final published versions. They should not be cited or distributed as the published version of this manuscript.

BMJ Open is an open access journal and the full, final, typeset and author-corrected version of record of the manuscript is available on our site with no access controls, subscription charges or pay-per-view fees (<http://bmjopen.bmj.com>).

If you have any questions on BMJ Open's open peer review process please email [info.bmjopen@bmj.com](mailto:info.bmjopen@bmj.com)

# BMJ Open

## EUROPEAN KNOWLEDGE ALLIANCE FOR INNOVATIVE MEASURES IN PREVENTION OF WORK-RELATED MUSCULOSKELETAL PAIN DISORDERS (PREVENT4WORK PROJECT): PROTOCOL FOR AN INTERNATIONAL MIXED METHODS LONGITUDINAL STUDY

|                               |                                                                                                                                                                                                                                                                                                                                                                                                                                                                                                                                                                                                                                                                                                                                                                                                                                                                                                                                                                                                                                                                                                                                                                                                                                                                                          |
|-------------------------------|------------------------------------------------------------------------------------------------------------------------------------------------------------------------------------------------------------------------------------------------------------------------------------------------------------------------------------------------------------------------------------------------------------------------------------------------------------------------------------------------------------------------------------------------------------------------------------------------------------------------------------------------------------------------------------------------------------------------------------------------------------------------------------------------------------------------------------------------------------------------------------------------------------------------------------------------------------------------------------------------------------------------------------------------------------------------------------------------------------------------------------------------------------------------------------------------------------------------------------------------------------------------------------------|
| Journal:                      | <i>BMJ Open</i>                                                                                                                                                                                                                                                                                                                                                                                                                                                                                                                                                                                                                                                                                                                                                                                                                                                                                                                                                                                                                                                                                                                                                                                                                                                                          |
| Manuscript ID                 | bmjopen-2021-052602                                                                                                                                                                                                                                                                                                                                                                                                                                                                                                                                                                                                                                                                                                                                                                                                                                                                                                                                                                                                                                                                                                                                                                                                                                                                      |
| Article Type:                 | Protocol                                                                                                                                                                                                                                                                                                                                                                                                                                                                                                                                                                                                                                                                                                                                                                                                                                                                                                                                                                                                                                                                                                                                                                                                                                                                                 |
| Date Submitted by the Author: | 21-Apr-2021                                                                                                                                                                                                                                                                                                                                                                                                                                                                                                                                                                                                                                                                                                                                                                                                                                                                                                                                                                                                                                                                                                                                                                                                                                                                              |
| Complete List of Authors:     | Bellosta-López, Pablo; Universidad San Jorge, Department of Physiotherapy<br>Domenech-Garcia, Victor ; Universidad San Jorge, Department of Physiotherapy<br>Palsson, Thorvaldur; Aalborg University, Department of Health Science and Technology<br>Christensen, Steffan ; University College of Northern Denmark, Department of Physiotherapy; Aalborg Universitet, SMI, Department of Health Science and Technology<br>Silva, Priscila de Brito; University College of Northern Denmark, Department of Physiotherapy<br>Langella, Francesco; IRCCS Istituto Ortopedico Galeazzi, Orthopedic & Traumatology<br>Berjano, P.; IRCCS Istituto Ortopedico Galeazzi,<br>Jensen, Palle Schlott; University College of Northern Denmark<br>Riis, Allan ; University College of Northern Denmark<br>Baroncini, Alice; IRCCS Istituto Ortopedico Galeazzi<br>Blasco-Abadía, Julia; Universidad San Jorge, Department of Physiotherapy<br>Jiménez-Sánchez, Carolina; Universidad San Jorge, Department of Physiotherapy<br>Calvo, Sandra; Universidad San Jorge, Department of Physiotherapy<br>Jaén-Carrillo, Diego; Universidad San Jorge<br>Herrero, Pablo; Universidad de Zaragoza, Fisiatría y Enfermería<br>Høgh, Morten ; Aalborg University, Department of Health Science and Technology |
| Keywords:                     | OCCUPATIONAL & INDUSTRIAL MEDICINE, Musculoskeletal disorders < ORTHOPAEDIC & TRAUMA SURGERY, PAIN MANAGEMENT                                                                                                                                                                                                                                                                                                                                                                                                                                                                                                                                                                                                                                                                                                                                                                                                                                                                                                                                                                                                                                                                                                                                                                            |
|                               |                                                                                                                                                                                                                                                                                                                                                                                                                                                                                                                                                                                                                                                                                                                                                                                                                                                                                                                                                                                                                                                                                                                                                                                                                                                                                          |

SCHOLARONE™  
Manuscripts

1  
2  
3  
4  
5  
6  
7  
8  
9  
10  
11  
12  
13  
14  
15  
16  
17  
18  
19  
20  
21  
22  
23  
24  
25  
26  
27  
28  
29  
30  
31  
32  
33  
34  
35  
36  
37  
38  
39  
40  
41  
42  
43  
44  
45  
46  
47  
48  
49  
50  
51  
52  
53  
54  
55  
56  
57  
58  
59  
60

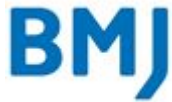

I, the Submitting Author has the right to grant and does grant on behalf of all authors of the Work (as defined in the below author licence), an exclusive licence and/or a non-exclusive licence for contributions from authors who are: i) UK Crown employees; ii) where BMJ has agreed a CC-BY licence shall apply, and/or iii) in accordance with the terms applicable for US Federal Government officers or employees acting as part of their official duties; on a worldwide, perpetual, irrevocable, royalty-free basis to BMJ Publishing Group Ltd ("BMJ") its licensees and where the relevant Journal is co-owned by BMJ to the co-owners of the Journal, to publish the Work in this journal and any other BMJ products and to exploit all rights, as set out in our [licence](#).

The Submitting Author accepts and understands that any supply made under these terms is made by BMJ to the Submitting Author unless you are acting as an employee on behalf of your employer or a postgraduate student of an affiliated institution which is paying any applicable article publishing charge ("APC") for Open Access articles. Where the Submitting Author wishes to make the Work available on an Open Access basis (and intends to pay the relevant APC), the terms of reuse of such Open Access shall be governed by a Creative Commons licence – details of these licences and which [Creative Commons](#) licence will apply to this Work are set out in our licence referred to above.

Other than as permitted in any relevant BMJ Author's Self Archiving Policies, I confirm this Work has not been accepted for publication elsewhere, is not being considered for publication elsewhere and does not duplicate material already published. I confirm all authors consent to publication of this Work and authorise the granting of this licence.

1  
2  
3 **Original paper for BMJ Open**  
4  
5

6 **EUROPEAN KNOWLEDGE ALLIANCE FOR INNOVATIVE MEASURES IN**  
7  
8 **PREVENTION OF WORK-RELATED MUSCULOSKELETAL PAIN**  
9  
10 **DISORDERS (PREVENT4WORK PROJECT): PROTOCOL FOR AN**  
11  
12 **INTERNATIONAL MIXED METHODS LONGITUDINAL STUDY**  
13  
14  
15  
16

17 Authors:

- 18 1. Pablo, BELLOSTA-LÓPEZ<sup>1</sup> – PBL  
19 2. Víctor, DOMÉNECH-GARCÍA<sup>1</sup> –VDG  
20  
21 ● Thorvaldur Skuli, PALSSON<sup>2</sup> – TSP  
22  
23 ● Steffan Wittrup McPhee, CHRISTENSEN<sup>2-3</sup> - SWMC  
24  
25 ● Priscila de Brito, SILVA<sup>3</sup> – PBS  
26  
27 ● Francesco, LANGELLA<sup>4</sup> – FL  
28  
29 ● Pedro, BERJANO<sup>4</sup> – PB  
30  
31 ● Palle Schlott, JENSEN<sup>3</sup> - PSJ  
32  
33 ● Allan, RIIS<sup>3,5</sup> - AR  
34  
35 ● Alice, BARONCINI<sup>4</sup> – AB  
36  
37 ● Julia, BLASCO-ABADÍA<sup>1</sup> - JBA  
38  
39 ● Carolina, JIMÉNEZ-SÁNCHEZ<sup>1</sup> - CJS  
40  
41 ● Sandra, CALVO<sup>1</sup> – SC  
42  
43 ● Diego, JAÉN-CARRILLO - DJC  
44  
45 ● Pablo, HERRERO<sup>6</sup> – PH

46 Last author: Morten, HOEGH<sup>2</sup> - MH

47 On behalf of "Prevent 4 Work" Study Group  
48  
49  
50  
51  
52

53 **Corresponding author:** Víctor Doménech-García, Universidad San Jorge. Campus  
54 Universitario, Autov. A23, Km 299, 50830 Villanueva de Gállego, Zaragoza, Spain. Tel.:  
55 (+34) 976 060 100 Fax.: 976 077 581. Email: [vdomenech@usj.es](mailto:vdomenech@usj.es)  
56  
57  
58  
59  
60

## Affiliations

<sup>1</sup>Universidad San Jorge. Campus Universitario, Autov. A23 km 299, 50830. Villanueva de Gállego, Zaragoza, Spain.

<sup>2</sup>Department of Health Science and Technology, Aalborg University, Aalborg, Denmark

<sup>3</sup>Department of Physiotherapy, University College of Northern Denmark, Aalborg, Denmark.

<sup>4</sup>IRCCS Istituto Ortopedico Galeazzi, Milan, Italy.

<sup>5</sup>The Research Unit for General Practice in Aalborg, Aalborg University, Aalborg, Denmark.

<sup>6</sup>Department of Physiatry and Nursing, Faculty of Health Sciences, University of Zaragoza, Zaragoza, Spain.

## ABSTRACT

### Introduction

Work-related musculoskeletal (MSK) pain is a highly prevalent condition and one of the main contributors to disability and loss of work capacity. Current approaches for the management and prevention of work-related MSK pain do not integrate current evidence-based knowledge and seem to be outdated. The Prevent4Work (P4W) project aims to collect and spread evidence-based information to improve the management and prevention of work-related MSK pain. P4W will longitudinally investigate i) risk factors associated with the prevalence of work-related MSK pain, ii) predictive factors for new events of work-related MSK pain in the short term, and iii) the modification of pain beliefs after participating in evidence-based e-learning courses.

### Methods and analysis

This project employs a mixed-methods design with international cohorts of workers from Spain, Italy, and Denmark. All participants will be assessed using self-reported variables at baseline (i.e., cross-sectional design) with follow-up after 3 and 6-months (i.e., prospective-predictive design). Throughout the first phase (month 0-3), all participants will be offered to self-enroll in e-learning courses on work-related MSK pain. Changes in pain beliefs (if any) will be assessed (i.e., pragmatic design). The dataset will include sociodemographic characteristics, physical and psychological job demands, lifestyle-related factors, MSK pain history, and pain beliefs. At baseline all participants will additionally complete the P4W questionnaire developed to detect populations at high risk of suffering work-related MSK pain.

Descriptive statistics, binary logistic regression, and analysis of variance will be used to identify the significant factors that influence the history of work-related MSK

1  
2  
3 pain, evaluate the short-term prediction capacity of the P4W questionnaire, and  
4  
5 investigate if workers' participation in e-learning courses modify their pain beliefs.  
6  
7  
8

### 9 **Ethics and dissemination**

10  
11 The study received ethical approval from the Ethical Committee of San Jorge University  
12 (USJ011-19/20). The results will be made available via peer-reviewed publications,  
13  
14 international conferences and Prevent4Work official channels.  
15  
16  
17  
18  
19  
20  
21  
22

## 23 **ARTICLE SUMMARY**

### 24 **Strengths and limitations of this study**

- 25  
26 • Large international longitudinal study examining risk factors associated with the  
27  
28 prevalence and the incidence of work-related MSK pain.  
29  
30
- 31  
32 • Prospective evaluation of workers' participation in e-learning evidence-based  
33  
34 courses and its effect on pain beliefs and work-related MSK pain.  
35  
36
- 37  
38 • Multidimensional assessment of workers is conducted.  
39
- 40  
41 • Only self-reported variables are obtained.  
42  
43

### 44 **Key Words:**

45  
46 Occupational & Industrial medicine, Musculoskeletal Disorders, Pain Management.  
47  
48  
49  
50  
51  
52  
53  
54  
55  
56  
57  
58  
59  
60



## INTRODUCTION

Work-related musculoskeletal (MSK) pain refers to pain related to or leading to work-related disability.<sup>1</sup> The level of disability can range from low to high and be episodic or permanent, thus reducing workers' quality of life and work capacity.<sup>2</sup> Self-reported pain in the neck and low back is the main complaint of workers reporting interfering pain.<sup>3</sup> According to the Sixth European Working Conditions Survey, 40% of workers report one event of pain per year, while 20% report having a chronic pain condition.<sup>4</sup>

Work-related MSK pain is a complex condition, consisting of multiple interacting factors such as i) physical factors (e.g., manual handling, working in awkward postures, repetitive work, and working at high speed), ii) individual factors (e.g., stress exposure, health beliefs, beliefs about pain, sleep quality, social support), iii) contextual factors (e.g., workplace design and organization) and, iv) sociodemographic factors (e.g., level of education).<sup>5</sup>

The incidence and prevalence rates of work-related MSK pain are increasing world-wide, which may indicate a sub-optimal effect of contemporary approaches for its management.<sup>6</sup> Insufficient implementation of evidence-based practice might be the primary contributor,<sup>7</sup> although outdated education of health care professionals and low-value treatments are also barriers for optimal management of work-related MSK pain.<sup>8 9</sup>

Previous, large-scale initiatives have demonstrated that educational interventions can modify pain beliefs among workers.<sup>10</sup> Therefore, given that outdated beliefs and expectations about health are associated with a higher risk of work-related MSK pain<sup>11</sup> and potentially with chronicity and disability,<sup>12</sup> educational interventions could be an ideal starting point. However, the impact of changes in pain beliefs on reducing new events and/or chronicity of work-related MSK pain has not yet been investigated.

### **Prevent4Work project:**

The European Knowledge Alliance "Prevent4Work" (P4W) project focuses on high-quality education for professionals and laypeople with regards to work-related MSK pain. This initiative has been created to improve work-related MSK pain management strategies by developing and implementing new assessment and interactive digital platforms. A self-perceived risk assessment questionnaire (P4W questionnaire) has recently been developed to detect populations at high risk of suffering work-related MSK pain.<sup>13</sup> Moreover, innovative educational programs will be introduced, and adaptive mobile interactive digital platforms, capable of delivering evidence-based information and collect data will be continuously developed (Supplemental Table 1).

The research-specific aims of the P4W project are i) to identify risk factors associated with the prevalence and/or the incidence of work-related MSK pain, ii) to evaluate the predictive capacity of the P4W questionnaire for new events of work-related MSK pain in the short term (i.e., three and six months), iii) to evaluate whether pain beliefs are modified in the short term after participating in e-learning evidence-based training activities about work-related MSK pain.

It has been suggested that the pandemic situation related to COVID-19 has had a significant negative effect on the physical and mental wellbeing of people with chronic pain.<sup>14</sup> Additionally, there is insufficient data on how/if the pandemic causes new events or flare-ups of pain across the successive waves of contagion.<sup>15</sup> Therefore, the project will explore potential relationships with the development of new events of self-perceived work-related MSK pain.

## **METHODS**

The present study protocol has complies with the Strengthening the Reporting of Observational Studies in Epidemiology (STROBE) recommendations.<sup>16</sup>

### **Study design**

This study protocol will follow a longitudinal mixed-methods design with international cohorts. All participants will be assessed by using self-reported variables at baseline (i.e., cross-sectional study design) and at 3 and 6-month follow-ups (i.e., prospective-predictive study design). Throughout the first phase (month 0-3), all participants will be offered to self-enroll in a free-learning course about work-related MSK pain. The analysis of data will be performed following a pragmatic study design (see figure 1).

FIGURE 1 HERE

### **Population**

The cohort will be composed of people in employment between 18 and 65 years of age, from Denmark, Italy, and Spain, who are fluent in either English, Danish, Italian, or Spanish, who have an easy access to a tablet/smartphone and internet. No specific exclusion criteria will be considered to be enrolled in the study. In the event of an enrolled participant changing the initial job position or taking any sort of leave during the study period, he/she will be excluded from the follow-up analysis.

### **Contact and recruitment**

Companies, institutions, and workers associations from Denmark, Italy, and Spain are invited to participate in P4W actions via the P4W network. Each organization will provide their workers information in the local language together with two animated videos (also

1  
2  
3 in the local language) explaining the aims and actions of the P4W project. The participants  
4  
5 recruited through here will provide data that will enable an evaluation of risk factors  
6  
7 associated with work-related MSK pain. Likewise, their participation in the P4W e-  
8  
9 learning courses about work-related MSK pain will allow for an evaluation of the content  
10  
11 from a user perspective. Participating organizations will be assigned a national liaison for  
12  
13 first-line support.  
14  
15  
16  
17

### 18 **Data collection and security measures**

19  
20  
21 Data collection will be conducted between April and December 2021. When  
22  
23 registering in the application for mobile devices (app), participants will have to accept the  
24  
25 informed consent to before they get a personal account. Two reminder messages will  
26  
27 appear within the main panel of the app. The first one will indicate that the linking with  
28  
29 the responsible academic institution in their country of residence is pending execution,  
30  
31 while the second one will remind that the survey and P4W questionnaire is ready to be  
32  
33 completed.  
34  
35  
36

37 All personal and survey data will be stored with record-level encryption at the  
38  
39 database level, meaning that it is all incomprehensible without first being decrypted.  
40  
41 Besides, the survey data will be pseudo-anonymized, so it is impossible to relate the  
42  
43 physical person and with their data directly. For processing and exporting purposes, all  
44  
45 data will be conveniently anonymized in a way that each data record is generated with a  
46  
47 unique identifier that is not possible to relate with the physical person and its personal  
48  
49 information.  
50  
51  
52

53 All the measures have been conducted to comply with EU's General Data  
54  
55 Protection Regulation <sup>17</sup> and implemented following recommended guidelines.<sup>18 19</sup>  
56  
57  
58  
59  
60

### **P4W courses**

All participants will be informed that they can choose to participate in one or more e-learning courses. P4W study group published a scoping review on the role of education in preventing and treating work-related MSK pain, finding that there is a basis for using education to complement other treatments.<sup>1</sup> Here, they can access animated videos with essential messages from systematic reviews on work-related MSK pain which have been produced specifically in relation to the project (Supplemental Table 2). The videos were developed in English and Spanish languages, with Italian or Danish subtitles and are publicly available in <https://p4work.com/results/> (retrieved on 31<sup>st</sup> March 2021). For further analysis, all participants that have been invited to take the courses will be classified based to their interaction with the animated videos as: i) No participation at all, ii) Visualization of videos in isolation / Starting, but not finishing an e-learning course, iii) Completion of one or more entire learning courses.

### **Outcome measures**

Table 1 summarizes outcome domains over the length of the study. Specific outcomes measures are presented in detail afterward.

**Table 1.** Summary of outcome domains assessed over the length of the study, including risk factors potentially associated with prevalence and/or incidence of work-related MSK pain.

| Period                                                       | Domains                                                                                                                                                                                                                      |
|--------------------------------------------------------------|------------------------------------------------------------------------------------------------------------------------------------------------------------------------------------------------------------------------------|
| <ul style="list-style-type: none"> <li>• Baseline</li> </ul> | <ul style="list-style-type: none"> <li>• P4W survey               <ul style="list-style-type: none"> <li>○ Individual factors</li> <li>○ Job demands</li> <li>○ Lifestyle</li> <li>○ MSK pain history</li> </ul> </li> </ul> |

|                                                                              |                                                                                                                                                                                                                                                                                                                                   |
|------------------------------------------------------------------------------|-----------------------------------------------------------------------------------------------------------------------------------------------------------------------------------------------------------------------------------------------------------------------------------------------------------------------------------|
|                                                                              | <ul style="list-style-type: none"> <li>○ COVID-19</li> <li>○ Pain Beliefs</li> <li>○ Work-related MSK pain training experience and interests</li> <li>● P4W questionnaire</li> </ul>                                                                                                                                              |
| <ul style="list-style-type: none"> <li>● 3- and 6-month follow-up</li> </ul> | <ul style="list-style-type: none"> <li>● P4W follow-up survey           <ul style="list-style-type: none"> <li>○ Verification of same job position</li> <li>○ Verification of e-learning course participation</li> <li>○ Lifestyle</li> <li>○ MSK pain history</li> <li>○ COVID-19</li> <li>○ Pain Beliefs</li> </ul> </li> </ul> |

### **Baseline**

At baseline, all participants will complete a survey composed of 5 sections:

*Section 1:* This section will collect sociodemographic and personal information such as age, sex, weight, height, education level, job position and seniority.

*Section 2:* This section will collect information about job demands at different levels such as physical demand, psychological demand, and decision capacity. Each domain is composed of different questions assessed on a 5-item Likert scale. The average scores of the different questions in each domain are classified as being in "high demand", "medium demand" or "low demand".<sup>20</sup> Following the same structure, four additional categories will be assessed in the P4W survey: "maintained postures", "repetitive movement", "overstrain", and "overtime".

1  
2  
3 *Section 3:* This section will collect information about lifestyle (physical activity out  
4 of work, sleep quality and quantity), medical history of MSK pain (including onset  
5 e.g., whiplash injury due to a car accident) and COVID-19 impact.  
6  
7

- 8  
9  
10 • **Physical activity** in leisure time will be evaluated by using the Global  
11 Physical Activity Questionnaire<sup>21</sup> proposed by the World Health  
12 Organization. Participants will be asked to indicate the number of days (if  
13 any) in a typical week and the average time in a day (in hours and minutes)  
14 they spend doing such type of moderate or vigorous intensity activities.  
15  
16
- 17 • **Sleep quality** will be evaluated by using the Medical Outcomes Study Sleep  
18 Scale.<sup>22</sup> Specifically, the sleep adequacy domain, composed of only 2  
19 questions, will be assessed. This domain is rated on a 6-item Likert scale, and  
20 the average of the two questions is transformed to a percentage. **Sleep**  
21 **quantity** will be assessed by asking for the average number of hours slept per  
22 night during the last 4 weeks.  
23  
24
- 25 • **Prevalence and history of self-reported work-related MSK pain** will be  
26 evaluated using the extended version of the Nordic Musculoskeletal  
27 Questionnaire.<sup>23</sup> The original 9 body regions in the original scale will be  
28 reduced to 4 (neck pain, low back pain, upper limb pain and lower limb pain).  
29 As part of the extended version, medication consumption, use of health  
30 services (physiotherapist, doctor, etc.) and difficulties to carry out work tasks,  
31 will be registered to evaluate the impact of MSK pain in workers.  
32  
33
- 34 • **COVID-19 impact** will be explored as a potential contributor to developing  
35 or aggravating MSK pain<sup>15</sup> by using supplementary ad hoc questions.  
36  
37  
38  
39  
40  
41  
42  
43  
44  
45  
46  
47  
48  
49  
50  
51  
52  
53  
54  
55  
56  
57

58 *Section 4:* Information about beliefs related to the cause and treatment of pain are  
59 collected using the Pain Beliefs Questionnaire.<sup>24</sup> The Pain Beliefs Questionnaire is a  
60

1  
2  
3 12-item questionnaire with a 6-point Likert scale that taps into the two dimensions  
4  
5 of pain beliefs (organic and psychological beliefs).  
6  
7

8  
9 *Section 5:* This section will collect information about the participants' training  
10  
11 experience and interests in the field of work-related MSK pain. The different topics  
12  
13 are based on the current management of work-related MSK pain and the latest  
14  
15 evidence regarding factors and interventions that can contribute to increase or  
16  
17 decrease the risk of suffering work-related MSK pain.<sup>5</sup>  
18  
19

20  
21  
22  
23 *Prevent4Work Questionnaire:* All workers will complete the P4W questionnaire. This  
24  
25 self-perceived risk assessment questionnaire was developed to detect populations at high  
26  
27 risk of work-related MSK pain.<sup>13</sup> The instrument uses a biopsychosocial approach based  
28  
29 on 20 items with a 5-point Likert scale and investigates four different domains: Physical  
30  
31 Stress, Mental Stress, Job Satisfaction and Kinesiophobia.  
32  
33

### 34 35 36 37 **Follow-up at 3 and 6 months**

38  
39 At follow-up (3 and 6-months), all participants will receive a reduced version of the  
40  
41 survey conducted at baseline. This reduced version of the survey will be composed of i)  
42  
43 a specific question to assure the participant is performing the same job and type of work  
44  
45 as baseline level, ii) a specific self-reported question related to the participation in e-  
46  
47 learning courses, iii) a reduced version of the Nordic Musculoskeletal Questionnaire  
48  
49 regarding the experience of new events of self-reported MSK pain in the last 3-6 months,  
50  
51 and iv) the Pain Beliefs Questionnaire.  
52  
53

54  
55 Data from the 3-month follow-up will be used to evaluate any potential change in  
56  
57 pain beliefs, whilst 6-month follow-up will be used to test the short-term prediction  
58  
59  
60



1  
2  
3 capacity of the P4W questionnaire for new events of MSK pain within the cohort of  
4  
5 workers at the neck, low back, upper limb, or lower limb.  
6  
7  
8

### 9 **Sample size**

10  
11 The present large-scale project needs to reach a sample of 1.500 workers to meet the  
12  
13 European Commission requirements and analyze the current risk factors for MSK pain.  
14

15  
16 This sample size is estimated to be valid to test the short-term prediction capacity of P4W  
17  
18 questionnaire for a new event of self-reported MSK pain based on performing a binary  
19  
20 logistic regression.<sup>25</sup> Under these circumstances, at least 331 workers should be followed-  
21  
22 up at 6 months in order to evaluate the predictive capacity of 10 candidate variables with  
23  
24 an incidence expectation at 15±5% of a new episode of self-reported MSK pain.<sup>26 27</sup>

25  
26 Additionally, the sample size will be large enough ( $n > 158$ ) to detect small to medium  
27  
28 differences within workers in the Pain Beliefs Questionnaire (Cohen's effect size  $d =$   
29  
30  $0.26$ )<sup>28</sup> with an alfa error of 0.05 and a power of 90%.  
31  
32  
33  
34  
35  
36

### 37 **Statistical analysis**

38  
39 In relation to the first aim, linked to the cross-sectional study, multiclass or binary logistic  
40  
41 regression will be applied to identify the major factors that influence the presence and/or  
42  
43 recent history of work-related MSK pain. In relation to the second aim, linked to the  
44  
45 cohort study, binary logistic regression will be used to evaluate the short-term prediction  
46  
47 capacity of the P4W questionnaire with regards to the appearance of a new MSK pain  
48  
49 event in the past 6 months according to the Nordic Musculoskeletal Questionnaire. In  
50  
51 relation to the third aim, linked to the pragmatic study, repeated measures analysis of  
52  
53 variance will be used to determine if workers' participation in e-learning courses modify  
54  
55 their pain beliefs. The analysis will be conducted under the intention-to-treat and per-  
56  
57 protocol principles, and the effect sizes will be reported for a better interpretation and  
58  
59  
60

1  
2  
3 controlling the risk of type-1 error. The significance level will be established for all the  
4  
5 analyses at  $P < 0.05$ .  
6  
7  
8

### 9 **Ethics and confidentiality**

10  
11 The study protocol was approved by the ethical committee at San Jorge University  
12 (USJ011-19/20). Each participant will be automatically assigned a study code once they  
13  
14 register on the app. This code will be the only downloadable information together with  
15  
16 health data by study researchers. All personal data needed for registration will be saved  
17  
18 in an independent database, which will be only accessible only for the principal  
19  
20 investigator and study coordinators in each country. Any deviation from the current  
21  
22 protocol will be explained and justified if necessary.  
23  
24  
25  
26  
27  
28  
29

### 30 **Dissemination**

31  
32 The results, regardless of the outcome, will be made available via peer-reviewed  
33  
34 publications in open-source journals, relevant international conferences in the field of  
35  
36 pain and occupational health, and via P4W official channels, such as the P4W website,  
37  
38 social media channels, and final project symposium. Results will likewise be done by  
39  
40 producing new high-quality videos on the P4W YouTube channel.  
41  
42  
43  
44  
45  
46  
47  
48  
49  
50  
51  
52  
53  
54  
55  
56  
57  
58  
59  
60

## REFERENCES

1. Palsson TS, Boudreau S, Høgh M, et al. Education as a strategy for managing occupational-related musculoskeletal pain: a scoping review. *BMJ Open* 2020;**10**(2):e032668.
2. Chang YF, Yeh CM, Huang SL, et al. Work Ability and Quality of Life in Patients with Work-Related Musculoskeletal Disorders. *Int J Environ Res Public Health* 2020;**17**(9)
3. de Kok J, Vroonhof P, Snijders J, et al. Work-related musculoskeletal disorders: prevalence, costs and demographics in the EU. Luxembourg: European Agency for Safety and Health at Work 2019. Available: [https://osha.europa.eu/sites/default/files/publications/documents/Work-related\\_MSDs\\_prevalence\\_costs\\_and\\_demographics\\_in\\_the\\_EU\\_report.pdf](https://osha.europa.eu/sites/default/files/publications/documents/Work-related_MSDs_prevalence_costs_and_demographics_in_the_EU_report.pdf)
4. Parent-Thirion A, Biletta I, Cabrita J, et al. Sixth European Working Conditions Survey – Overview report (2017 update). Luxembourg: European Foundation for the Improvement of Living and Working Conditions 2017. Available: [https://www.eurofound.europa.eu/sites/default/files/ef\\_publication/field\\_ef\\_document/ef1634en.pdf](https://www.eurofound.europa.eu/sites/default/files/ef_publication/field_ef_document/ef1634en.pdf)
5. Isusi I. Work-related musculoskeletal disorders – Facts and figures. Luxembourg: European Agency for Safety and Health at Work 2020. Available: [https://osha.europa.eu/sites/default/files/publications/documents/Work\\_related\\_musculoskeletal\\_disorders\\_%20Facts\\_and\\_figures.pdf](https://osha.europa.eu/sites/default/files/publications/documents/Work_related_musculoskeletal_disorders_%20Facts_and_figures.pdf)
6. Crawford JO, Davis A. Work-related musculoskeletal disorders: why are they still so prevalent? Evidence from a literature review. Luxembourg: European Agency for Safety and Health at Work 2020. Available: [https://osha.europa.eu/sites/default/files/publications/documents/Work\\_related\\_musculoskeletal\\_disorders\\_why\\_so\\_prevalent\\_report.pdf](https://osha.europa.eu/sites/default/files/publications/documents/Work_related_musculoskeletal_disorders_why_so_prevalent_report.pdf)

- 1  
2  
3 7. Buchbinder R, Underwood M, Hartvigsen J, et al. The Lancet Series call to action to  
4  
5 reduce low value care for low back pain: an update. *Pain* 2020;**161 Suppl**  
6  
7 **1(1):S57-S64.**  
8
- 9 8. Foster NE, Anema JR, Cherkin D, et al. Prevention and treatment of low back pain:  
10  
11 evidence, challenges, and promising directions. *Lancet* 2018;**391(10137):2368-**  
12  
13 **83.**  
14
- 15 9. Slade SC, Kent P, Patel S, et al. Barriers to Primary Care Clinician Adherence to  
16  
17 Clinical Guidelines for the Management of Low Back Pain: A Systematic Review  
18  
19 and Metasynthesis of Qualitative Studies. *Clin J Pain* 2016;**32(9):800-16.**  
20  
21
- 22 10. Andersen LL, Geisler N, Knudsen B. Can beliefs about musculoskeletal pain and work  
23  
24 be changed at the national level? Prospective evaluation of the Danish national  
25  
26 Job & Body campaign. *Scand J Work Environ Health* 2018;**44(1):25-36.**  
27  
28
- 29 11. Vargas-Prada S, Coggon D. Psychological and psychosocial determinants of  
30  
31 musculoskeletal pain and associated disability. *Best Pract Res Clin Rheumatol*  
32  
33 2015;**29(3):374-90.**  
34  
35
- 36 12. Coggon D, Ntani G, Palmer KT, et al. Disabling musculoskeletal pain in working  
37  
38 populations: is it the job, the person, or the culture? *Pain* 2013;**154(6):856-63.**  
39  
40
- 41 13. Langella F, Christensen SWM, Palsson TS, et al. Development of the Prevent for  
42  
43 Work questionnaire (P4Wq) for assessment of musculoskeletal risk in the  
44  
45 workplace: part 1-literature review and domains selection. *BMJ Open*  
46  
47 2021;**11(4):e043800.**  
48  
49
- 50 14. Carrillo-de-la-Peña MT, González-Villar A, Triñanes Y. Effects of the COVID-19  
51  
52 pandemic on chronic pain in Spain: a scoping review. *Pain Rep* 2021;**6(1):e899.**  
53  
54
- 55 15. Cipollaro L, Giordano L, Padulo J, et al. Musculoskeletal symptoms in SARS-CoV-  
56  
57 2 (COVID-19) patients. *J Orthop Surg Res* 2020;**15(1):178.**  
58  
59  
60

16. von Elm E, Altman DG, Egger M, et al. Strengthening the Reporting of Observational Studies in Epidemiology (STROBE) statement: guidelines for reporting observational studies. *BMJ* 2007;**335**(7624):806-8.
17. Regulation (EU) 2016/679 of the European Parliament and of the Council of 27 April 2016 on the protection of natural persons with regard to the processing of personal data and on the free movement of such data, and repealing Directive 95/46/EC (General Data Protection Regulation). *Official Journal of the European Union* 2016;**119**(1)
18. Agencia Española de Protección de Datos A. Orientaciones y garantías en los procedimientos de anonimización de datos personales. 2016. Available: <https://www.aepd.es/sites/default/files/2019-09/guia-orientaciones-procedimientos-anonimizacion.pdf>
19. Agencia Española de Protección de Datos A. Guía del Reglamento General de Protección de Datos para responsables de tratamiento. 2016. Available: <https://www.aepd.es/sites/default/files/2019-09/guia-rgpd-para-responsables-de-tratamiento.pdf>
20. Cantley LF, Tessier-Sherman B, Slade MD, et al. Expert ratings of job demand and job control as predictors of injury and musculoskeletal disorder risk in a manufacturing cohort. *Occup Environ Med* 2016;**73**(4):229-36.
21. Wanner M, Hartmann C, Pestoni G, et al. Validation of the Global Physical Activity Questionnaire for self-administration in a European context. *BMJ Open Sport Exerc Med* 2017;**3**(1):e000206.
22. Hays RD, Martin SA, Sesti AM, et al. Psychometric properties of the Medical Outcomes Study Sleep measure. *Sleep medicine* 2005;**6**(1):41-4.
23. Dawson AP, Steele EJ, Hodges PW, et al. Development and test-retest reliability of an extended version of the Nordic Musculoskeletal Questionnaire (NMQ-E): a

- 1  
2  
3 screening instrument for musculoskeletal pain. *The journal of pain : official*  
4  
5 *journal of the American Pain Society* 2009;**10**(5):517-26.  
6
- 7 24. Edwards LC, Pearce SA, Turner-Stokes L, et al. The Pain Beliefs Questionnaire: an  
8  
9 investigation of beliefs in the causes and consequences of pain. *Pain*  
10  
11 1992;**51**(3):267-72.  
12
- 13 25. Riley RD, Ensor J, Snell KIE, et al. Calculating the sample size required for  
14  
15 developing a clinical prediction model. *BMJ* 2020;**368**:m441.  
16
- 17 26. Ostergren PO, Hanson BS, Balogh I, et al. Incidence of shoulder and neck pain in a  
18  
19 working population: effect modification between mechanical and psychosocial  
20  
21 exposures at work? Results from a one year follow up of the Malmö shoulder and  
22  
23 neck study cohort. *J Epidemiol Community Health* 2005;**59**(9):721-8.  
24  
25
- 26 27. Vargas-Prada S, Serra C, Martínez JM, et al. Psychological and culturally-influenced  
27  
28 risk factors for the incidence and persistence of low back pain and associated  
29  
30 disability in Spanish workers: findings from the CUPID study. *Occup Environ*  
31  
32 *Med* 2013;**70**(1):57-62.  
33  
34
- 35 28. Baird AJ, Haslam RA. Exploring differences in pain beliefs within and between a  
36  
37 large nonclinical (workplace) population and a clinical (chronic low back pain)  
38  
39 population using the pain beliefs questionnaire. *Phys Ther* 2013;**93**(12):1615-24.  
40  
41  
42  
43  
44  
45  
46  
47  
48  
49  
50  
51  
52  
53  
54  
55  
56  
57  
58  
59  
60

## **DECLARATIONS**

### **Authors' contributions**

All authors contributed significantly to the design of this study protocol and lived up to the requirements of the International Committee of Medical Journal Editors (ICMJE). PBL, VDG, TSP, SWMC, PS, FL, PB, PH and MH contributed to the conception and planning of the study protocol. PBL, VDG, TSP, PS, AR, PB and MH contributed to the acquisition of the data for the work. PBL, VDG, TSP, SWMC, PS, PSJ, FL, PB, AB, JBA, CJS, SC, DJC, PH and MH contributed to the development of educational content and evaluation tools. All authors contributed to writing the article and have read and approved the final manuscript.

### **Funding**

This study was funded by Erasmus+ Program (agreement no. 2018-2381/001-001, project no.19 600920-EPP-1-2018-1-ES-EPPKA2-KA). PBL has been supported during the elaboration of the present work by the Grant CPB09/18 from "Gobierno de Aragón" and co-financed by "Programa Operativo FSE Aragón 2014-2020, Construyendo Europa desde Aragón" and the Grant FPU19/05237. FL, PB and AB are supported by the Italian Ministry of Health (agreement number not applicable). The funders did not have any role in this study.

### **Competing interests**

None declared.

### **Patient and public involvement**

Patients and/or the public were not involved in the design, or conduct, or reporting, or dissemination plans of this research.

1  
2  
3  
4  
5 **Patient consent for publication**  
6

7 Not required.  
8  
9

10  
11  
12 **Provenance and peer review**  
13

14 Not commissioned, externally peer reviewed.  
15  
16

17  
18  
19 **Word Count:** 2,297  
20  
21  
22  
23  
24  
25  
26  
27  
28  
29  
30  
31  
32  
33  
34  
35  
36  
37  
38  
39  
40  
41  
42  
43  
44  
45  
46  
47  
48  
49  
50  
51  
52  
53  
54  
55  
56  
57  
58  
59  
60



1  
2  
3  
4  
5  
6  
7  
8  
9  
10  
11  
12  
13  
14  
15  
16  
17  
18  
19  
20  
21  
22  
23  
24  
25  
26  
27  
28  
29  
30  
31  
32  
33  
34  
35  
36  
37  
38  
39  
40  
41  
42  
43  
44  
45  
46  
47  
48  
49  
50  
51  
52  
53  
54  
55  
56  
57  
58  
59  
60

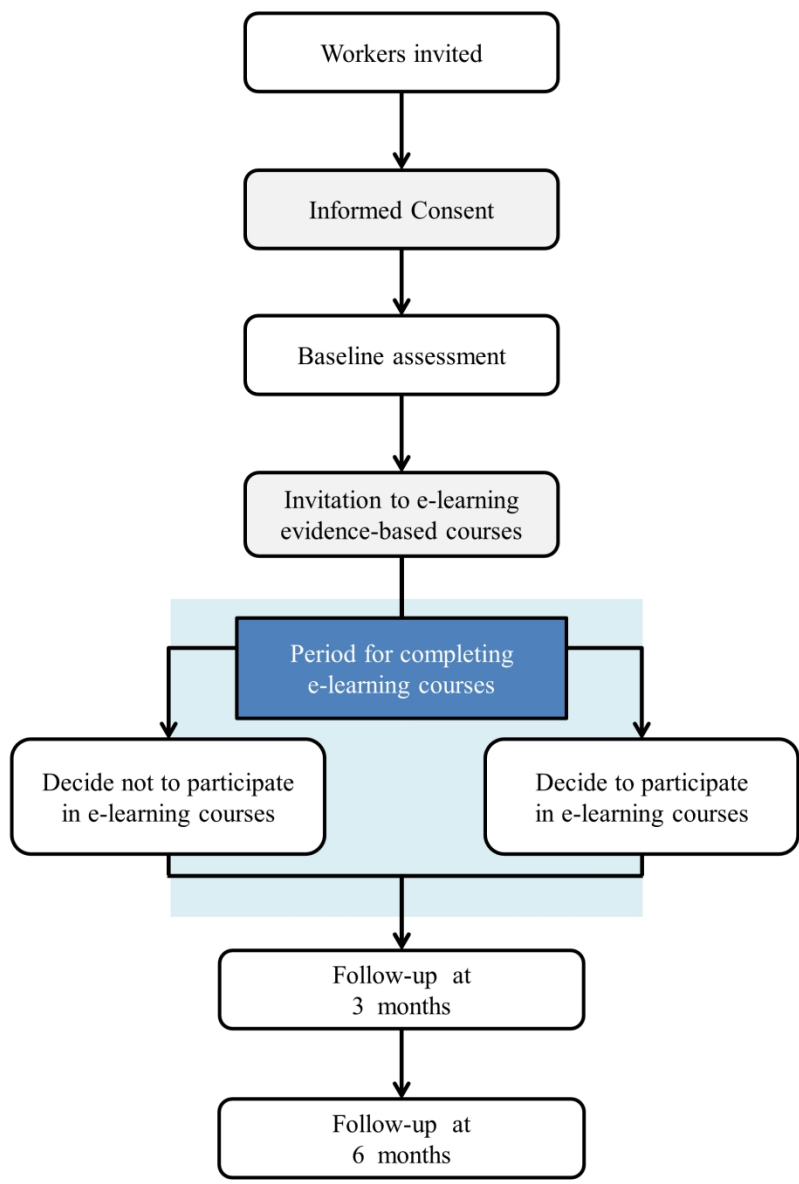

Figure 1. Study timeline design  
170x230mm (300 x 300 DPI)

**Supplemental table 1.** List of P4W links resources: innovative educational programs and adaptive mobile interactive digital platforms for delivering evidence-based information and collecting data.

| <b>Resource</b>                       | <b>Link</b>                                                                                                                                                   |
|---------------------------------------|---------------------------------------------------------------------------------------------------------------------------------------------------------------|
| P4W web page                          | <a href="https://p4work.com/">https://p4work.com/</a>                                                                                                         |
| P4W app for iOS                       | <a href="https://apps.apple.com/es/app/p4work/id1509417286">https://apps.apple.com/es/app/p4work/id1509417286</a>                                             |
| P4W app for Android                   | <a href="https://play.google.com/store/apps/details?id=com.geoslab.p4w&amp;hl=es">https://play.google.com/store/apps/details?id=com.geoslab.p4w&amp;hl=es</a> |
| P4W e-learning platform               | <a href="https://aulaonline.p4work.com/">https://aulaonline.p4work.com/</a>                                                                                   |
| P4W Youtube channel                   | <a href="https://www.youtube.com/channel/Prevent4Work">https://www.youtube.com/channel/Prevent4Work</a>                                                       |
| P4W Facebook account                  | <a href="https://www.facebook.com/Prevent4Work-558730587928229/">https://www.facebook.com/Prevent4Work-558730587928229/</a>                                   |
| P4W Linkedin profile                  | <a href="https://www.linkedin.com/company/prevent4work/">https://www.linkedin.com/company/prevent4work/</a>                                                   |
| P4W video presentation                | <a href="https://youtu.be/PNcVgohx1jw">https://youtu.be/PNcVgohx1jw</a>                                                                                       |
| P4W app videotutorial                 | <a href="https://youtu.be/M6mDbN6itlw">https://youtu.be/M6mDbN6itlw</a>                                                                                       |
| P4W e-learning platform videotutorial | <a href="https://youtu.be/S0ORsO0ECZk">https://youtu.be/S0ORsO0ECZk</a>                                                                                       |

**Supplemental table 2.** List of P4W animated educational videos with essential messages and evidence-based information related to musculoskeletal pain and work.

| # Video & Link                                                               | Title                                                                                              | Description                                                                                                                                                                                                                                                                                   | Inspired in the article                                                                                                                                                                                                                                                                                    |
|------------------------------------------------------------------------------|----------------------------------------------------------------------------------------------------|-----------------------------------------------------------------------------------------------------------------------------------------------------------------------------------------------------------------------------------------------------------------------------------------------|------------------------------------------------------------------------------------------------------------------------------------------------------------------------------------------------------------------------------------------------------------------------------------------------------------|
| 1<br><a href="https://youtu.be/7cao2oIyomg">https://youtu.be/7cao2oIyomg</a> | P4Work   Best Practices for Musculoskeletal Pain management (1): Patient-Centred Care              | <p>This is the first of three videos where you will learn about the best recommendations for addressing musculoskeletal pain in your clinical practice.</p> <p>This video is mainly intended for healthcare professionals and the general public who want to learn more about the topic.</p>  | Lin I, Wiles L, Waller R, Goucke R, Nagree Y, Gibberd M, Straker L, Maher CG, O'Sullivan PPB. What does best practice care for musculoskeletal pain look like? Eleven consistent recommendations from high-quality clinical practice guidelines: systematic review. Br J Sports Med. 2020 Jan;54(2):79-86. |
| 2<br><a href="https://youtu.be/3qBWsV_v2nM">https://youtu.be/3qBWsV_v2nM</a> | P4Work   Best Practices for Musculoskeletal Pain management (2): Clinical Screening                | <p>This is the second of three videos where you will learn about the best recommendations for addressing musculoskeletal pain in your clinical practice.</p> <p>This video is mainly intended for healthcare professionals and the general public who want to learn more about the topic.</p> | Lin I, Wiles L, Waller R, Goucke R, Nagree Y, Gibberd M, Straker L, Maher CG, O'Sullivan PPB. What does best practice care for musculoskeletal pain look like? Eleven consistent recommendations from high-quality clinical practice guidelines: systematic review. Br J Sports Med. 2020 Jan;54(2):79-86. |
| 3<br><a href="https://youtu.be/wx1OG1yRVSG">https://youtu.be/wx1OG1yRVSG</a> | P4Work   Best Practices for Musculoskeletal Pain management (3): Interventions and Recommendations | <p>This is the third of three videos where you will learn about the best recommendations for addressing musculoskeletal pain in your clinical practice.</p> <p>This video is mainly intended for healthcare professionals and the general public who want to learn more about the topic.</p>  | Lin I, Wiles L, Waller R, Goucke R, Nagree Y, Gibberd M, Straker L, Maher CG, O'Sullivan PPB. What does best practice care for musculoskeletal pain look like? Eleven consistent recommendations from high-quality clinical practice guidelines: systematic review. Br J Sports Med. 2020 Jan;54(2):79-86. |

| # Video & Link                                                               | Title                                                                                   | Description                                                                                                                                                                                                                                                                                            | Inspired in the article                                                                                                                                                                                                                                                                                                                                                                                                                                                                                              |
|------------------------------------------------------------------------------|-----------------------------------------------------------------------------------------|--------------------------------------------------------------------------------------------------------------------------------------------------------------------------------------------------------------------------------------------------------------------------------------------------------|----------------------------------------------------------------------------------------------------------------------------------------------------------------------------------------------------------------------------------------------------------------------------------------------------------------------------------------------------------------------------------------------------------------------------------------------------------------------------------------------------------------------|
| 4<br><a href="https://youtu.be/k1CAyUDr1xI">https://youtu.be/k1CAyUDr1xI</a> | P4Work   Recommendations for people suffering from Musculoskeletal Pain                 | <p>In this video you will learn about the best and updated recommendations for people having musculoskeletal pain.</p> <p>This video is intended for a public audience who want to learn more about the topic.</p>                                                                                     | <p>Lin I, Wiles L, Waller R, Goucke R, Nagree Y, Gibberd M, Straker L, Maher CG, O'Sullivan PPB. What does best practice care for musculoskeletal pain look like? Eleven consistent recommendations from high-quality clinical practice guidelines: systematic review. Br J Sports Med. 2020 Jan;54(2):79-86.</p>                                                                                                                                                                                                    |
| 5<br><a href="https://youtu.be/Bad9Wjb0hUU">https://youtu.be/Bad9Wjb0hUU</a> | P4Work   Best scientific evidence on self-management programs for chronic low back pain | <p>This video you will learn about the importance of the self-management program for chronic low back pain. It wants to teach people how to manage their pain and better-known related care decisions.</p> <p>This video is intended for a public audience who want to learn more about the topic.</p> | <p>Lin I, Wiles L, Waller R, Goucke R, Nagree Y, Gibberd M, Straker L, Maher CG, O'Sullivan PPB. What does best practice care for musculoskeletal pain look like? Eleven consistent recommendations from high-quality clinical practice guidelines: systematic review. Br J Sports Med. 2020 Jan;54(2):79-86</p> <p>Du S, Hu L, Dong J, Xu G, Chen X, Jin S, Zhang H, Yin H. Self-management program for chronic low back pain: A systematic review and meta-analysis. Patient Educ Couns. 2017 Jan;100(1):37-49</p> |

| # Video & Link                                                                          | Title                                                                | Description                                                                                                                                                                                                                                                                   | Inspired in the article                                                                                                                                                                                                                                                                                                                                                                                                                                                                                                                                                                                  |
|-----------------------------------------------------------------------------------------|----------------------------------------------------------------------|-------------------------------------------------------------------------------------------------------------------------------------------------------------------------------------------------------------------------------------------------------------------------------|----------------------------------------------------------------------------------------------------------------------------------------------------------------------------------------------------------------------------------------------------------------------------------------------------------------------------------------------------------------------------------------------------------------------------------------------------------------------------------------------------------------------------------------------------------------------------------------------------------|
| <p>6</p> <p><a href="https://youtu.be/9De7xeDATGU">https://youtu.be/9De7xeDATGU</a></p> | <p>P4Work   What everyone should know about low back pain</p>        | <p>In this video you will learn about the concept of "Low Back Pain" and related issues such as prevalence, prognosis, and evidence-based recommendations for its management.</p> <p>This video is intended for a public audience who want to learn more about the topic.</p> | <p>Hartvigsen J, Hancock MJ, Kongsted A, Louw Q, Ferreira ML, Genevay S, Hoy D, Karppinen J, Pransky G, Sieper J, Smeets RJ, Underwood M; Lancet Low Back Pain Series Working Group. What low back pain is and why we need to pay attention. Lancet. 2018 Jun 9;391(10137):2356-2367.</p> <p>Foster NE, Anema JR, Cherkin D, Chou R, Cohen SP, Gross DP, Ferreira PH, Fritz JM, Koes BW, Peul W, Turner JA, Maher CG; Lancet Low Back Pain Series Working Group. Prevention and treatment of low back pain: evidence, challenges, and promising directions. Lancet. 2018 Jun 9;391(10137):2368-2383.</p> |
| <p>7</p> <p><a href="https://youtu.be/aGEKmt81SA">https://youtu.be/aGEKmt81SA</a></p>   | <p>P4Work   Recovery expectations and prognosis in Low Back Pain</p> | <p>In this video you will learn more about how positive or negative expectations might influence return to work after a low back pain episode.</p> <p>This video is intended for a public audience who want to learn more about the topic.</p>                                | <p>Hayden JA, Wilson MN, Riley RD, Iles R, Pincus T, Ogilvie R. Individual recovery expectations and prognosis of outcomes in non-specific low back pain: prognostic factor review. Cochrane Database Syst Rev. 2019 Nov 25;2019(11):CD011284</p>                                                                                                                                                                                                                                                                                                                                                        |

| # Video & Link                                                               | Title                                                                                        | Description                                                                                                                                                                                                                                                                                                                                                                                                                                                                                                                                                    | Inspired in the article                                                                                                                                                                                                            |
|------------------------------------------------------------------------------|----------------------------------------------------------------------------------------------|----------------------------------------------------------------------------------------------------------------------------------------------------------------------------------------------------------------------------------------------------------------------------------------------------------------------------------------------------------------------------------------------------------------------------------------------------------------------------------------------------------------------------------------------------------------|------------------------------------------------------------------------------------------------------------------------------------------------------------------------------------------------------------------------------------|
| 8<br><a href="https://youtu.be/BVJy3DxURL0">https://youtu.be/BVJy3DxURL0</a> | P4Work   Workplace interventions to prevent work disability in workers on sick leave         | <p>In this video you will learn about the possible workplace interventions that can be conducted to prevent work disability in workers on sick leave.</p> <p>This video is intended for a general audience who wants to learn more about the topic. However, it is mainly meant for health professionals and persons responsible for occupational safety and health in businesses, companies, and institutions.</p>                                                                                                                                            | van Vilsteren M, van Oostrom SH, de Vet HC, Franche RL, Boot CR, Anema JR. Workplace interventions to prevent work disability in workers on sick leave. Cochrane Database Syst Rev. 2015 Oct 5;(10):CD006955.                      |
| 9<br><a href="https://youtu.be/j3Sh7AbdWVM">https://youtu.be/j3Sh7AbdWVM</a> | P4Work   Workplace interventions to reduce musculoskeletal pain in physically demanding jobs | <p>In this video you will learn about workplace interventions to rehabilitate musculoskeletal disorders among employees with physically demanding work. It is about interventions and attitudes to be taken in the workplace to improve musculoskeletal pain management and to prevent injuries.</p> <p>This video is intended for a general audience who wants to learn more about the topic. However, it is mainly meant for health professionals and persons responsible for occupational safety and health in businesses, companies, and institutions.</p> | Sundstrup E, Seeberg KGV, Bengtsen E, Andersen LL. A Systematic Review of Workplace Interventions to Rehabilitate Musculoskeletal Disorders Among Employees with Physical Demanding Work. J Occup Rehabil. 2020 Dec;30(4):588-612. |

| # Video & Link                                                                | Title                                                                                      | Description                                                                                                                                                                                                                                                                                 | Inspired in the article                                                                                                                                                                                                                                                                                 |
|-------------------------------------------------------------------------------|--------------------------------------------------------------------------------------------|---------------------------------------------------------------------------------------------------------------------------------------------------------------------------------------------------------------------------------------------------------------------------------------------|---------------------------------------------------------------------------------------------------------------------------------------------------------------------------------------------------------------------------------------------------------------------------------------------------------|
| 10<br><a href="https://youtu.be/neobG3tqmV4">https://youtu.be/neobG3tqmV4</a> | P4Work   Pain at work? Be active                                                           | In this video you will learn about different practical strategies to manage and prevent musculoskeletal pain at the workplace.<br><br>This video is intended for a public audience who want to learn more about the topic.                                                                  | The episode is inspired by the idea awarded at the first Prevent4Work Symposium held in Milan on November 15th, 2019.                                                                                                                                                                                   |
| 11<br><a href="https://youtu.be/-ncVBf5rSrU">https://youtu.be/-ncVBf5rSrU</a> | P4Work   Benefits from ergonomic interventions for musculoskeletal pain management at work | In this video you will learn about the current evidence of several ergonomic interventions intended to prevent and manage musculoskeletal pain in the upper limb and neck among office workers.<br><br>This video is intended for a public audience who want to learn more about the topic. | Hoe VC, Urquhart DM, Kelsall HL, Zamri EN, Sim MR. Ergonomic interventions for preventing work-related musculoskeletal disorders of the upper limb and neck among office workers. Cochrane Database Syst Rev. 2018 Oct 23;10(10):CD008570.                                                              |
| 12<br><a href="https://youtu.be/8yKWk2oE85A">https://youtu.be/8yKWk2oE85A</a> | P4Work   Low Back Pain Course for workers                                                  | Introduction to the course "Low Back Pain", addressed to workers for all activity sectors and occupations.                                                                                                                                                                                  |                                                                                                                                                                                                                                                                                                         |
| 13<br><a href="https://youtu.be/Vp5IwXiVu8c">https://youtu.be/Vp5IwXiVu8c</a> | P4Work   Current evidence for the treatment and management of Low Back Pain                | In this video you will learn more about the management and treatment options of Low Back Pain according to current evidence-based guidelines.<br><br>This video is intended for a public audience who want to learn more about the topic.                                                   | Foster NE, Anema JR, Cherkin D, Chou R, Cohen SP, Gross DP, Ferreira PH, Fritz JM, Koes BW, Peul W, Turner JA, Maher CG; Lancet Low Back Pain Series Working Group. Prevention and treatment of low back pain: evidence, challenges, and promising directions. Lancet. 2018 Jun 9;391(10137):2368-2383. |

| # Video & Link                                                                | Title                                                   | Description                                                                                                                                                                                                                                                                                                                                               | Inspired in the article                                                                                                                                                                                                                                                                                         |
|-------------------------------------------------------------------------------|---------------------------------------------------------|-----------------------------------------------------------------------------------------------------------------------------------------------------------------------------------------------------------------------------------------------------------------------------------------------------------------------------------------------------------|-----------------------------------------------------------------------------------------------------------------------------------------------------------------------------------------------------------------------------------------------------------------------------------------------------------------|
| 14<br><a href="https://youtu.be/iaP4YnUXRjA">https://youtu.be/iaP4YnUXRjA</a> | P4Work   Neck Pain Course for workers                   | Introduction to the "Neck Pain course", addressed to workers for all activity sectors and occupations.                                                                                                                                                                                                                                                    |                                                                                                                                                                                                                                                                                                                 |
| 15<br><a href="https://youtu.be/oDoySdozQKI">https://youtu.be/oDoySdozQKI</a> | P4Work   How to help reduce the burden of Low Back Pain | In this video you will learn about what information health providers can offer to help those patients suffering from acute or chronic low back pain.<br><br>This video is mainly intended for healthcare professionals and the general public who want to learn more about the topic.                                                                     | Lim YZ, Chou L, Au RT, Seneviwickrama KMD, Cicuttini FM, Briggs AM, Sullivan K, Urquhart DM, Wluka AE. People with low back pain want clear, consistent and personalised information on prognosis, treatment options and self-management strategies: a systematic review. J Physiother. 2019 Jul;65(3):124-135. |
| 16<br><a href="https://youtu.be/WSoWBDsQIcY">https://youtu.be/WSoWBDsQIcY</a> | P4Work   How does Low Back Pain behave?                 | In this video you will learn about the most common symptoms trajectories for low back pain. You will know about practical strategies for advising individual patients on how to behave in the presence of low back pain.<br><br>This video is mainly intended for healthcare professionals and the general public who want to learn more about the topic. | Hartvigsen J, Hancock MJ, Kongsted A, Louw Q, Ferreira ML, Genevay S, Hoy D, Karppinen J, Pransky G, Sieper J, Smeets RJ, Underwood M; Lancet Low Back Pain Series Working Group. What low back pain is and why we need to pay attention. Lancet. 2018 Jun 9;391(10137):2356-2367.                              |
| 17<br><a href="https://youtu.be/tBMjdNIZwI0">https://youtu.be/tBMjdNIZwI0</a> | P4Work   Predicting factors for Low Back Pain           | In this video you will learn about some of the factors related to positive or negative outcomes of low back pain.<br><br>This video is intended for a public audience who want to learn more about the topic.                                                                                                                                             | Hartvigsen J, Hancock MJ, Kongsted A, Louw Q, Ferreira ML, Genevay S, Hoy D, Karppinen J, Pransky G, Sieper J, Smeets RJ, Underwood M; Lancet Low Back Pain Series Working Group. What low back pain is and why we need to pay                                                                                  |



| # Video & Link                                                                | Title                                                     | Description                                                                                                                                                                                                                                   | Inspired in the article                                                                                                                                                                                                                                                            |
|-------------------------------------------------------------------------------|-----------------------------------------------------------|-----------------------------------------------------------------------------------------------------------------------------------------------------------------------------------------------------------------------------------------------|------------------------------------------------------------------------------------------------------------------------------------------------------------------------------------------------------------------------------------------------------------------------------------|
|                                                                               |                                                           |                                                                                                                                                                                                                                               | attention. Lancet. 2018 Jun 9;391(10137):2356-2367.                                                                                                                                                                                                                                |
| 18<br><a href="https://youtu.be/kXBnxSlilDA">https://youtu.be/kXBnxSlilDA</a> | P4Work   Epidemiology of Low Back Pain                    | <p>In this video you will learn about the social and economic impact of low back pain and what the evolution perspectives for the future are.</p> <p>This video is intended for a public audience who want to learn more about the topic.</p> | Hartvigsen J, Hancock MJ, Kongsted A, Louw Q, Ferreira ML, Genevay S, Hoy D, Karppinen J, Pransky G, Sieper J, Smeets RJ, Underwood M; Lancet Low Back Pain Series Working Group. What low back pain is and why we need to pay attention. Lancet. 2018 Jun 9;391(10137):2356-2367. |
| 19<br><a href="https://youtu.be/eWdm4H5yTYU">https://youtu.be/eWdm4H5yTYU</a> | P4Work   Neuroscience Education for Chronic Low Back Pain | <p>In this video you will learn about what Pain Neuroscience Education (PNE) is and why it is used.</p> <p>This video is intended for a public audience who want to learn more about the topic.</p>                                           | Tegner H, Frederiksen P, Esbensen BA, Juhl C. Neurophysiological Pain Education for Patients with Chronic Low Back Pain: A Systematic Review and Meta-Analysis. Clin J Pain. 2018 Aug;34(8):778-786.                                                                               |
| 20<br><a href="https://youtu.be/k0J08OUw8pc">https://youtu.be/k0J08OUw8pc</a> | P4Work   What is neck pain?                               | <p>In this video you will learn about what neck pain is, its classification, its prognosis, and some guidelines for neck pain management.</p> <p>This video is intended for a public audience who want to learn more about the topic.</p>     | Parikh P, Santaguida P, Macdermid J, Gross A, Eshtiaghi A. Comparison of CPG's for the diagnosis, prognosis and management of non-specific neck pain: a systematic review. BMC Musculoskelet Disord. 2019 Feb 14;20(1):81.                                                         |

| # Video & Link                                                                | Title                                                                                | Description                                                                                                                                                                                                                                                       | Inspired in the article                                                                                                                                                                                                                                                                                                                                                                                                                                                                                                                                                                                                                         |
|-------------------------------------------------------------------------------|--------------------------------------------------------------------------------------|-------------------------------------------------------------------------------------------------------------------------------------------------------------------------------------------------------------------------------------------------------------------|-------------------------------------------------------------------------------------------------------------------------------------------------------------------------------------------------------------------------------------------------------------------------------------------------------------------------------------------------------------------------------------------------------------------------------------------------------------------------------------------------------------------------------------------------------------------------------------------------------------------------------------------------|
| 21<br><a href="https://youtu.be/sS-Cxg_RO7A">https://youtu.be/sS-Cxg_RO7A</a> | P4Work   What is the current evidence for the management and treatment of Neck Pain? | <p>In this video you will learn more about the management and treatment options of non-specific neck pain according to current evidence-based guidelines.</p> <p>This video is intended for a public audience who want to learn more about the topic.</p>         | <p>Sterling M, de Zoete RMJ, Coppieters I, Farrell SF. Best Evidence Rehabilitation for Chronic Pain Part 4: Neck Pain. J Clin Med. 2019 Aug 15;8(8):1219.</p> <p>Ainpradub K, Sitthipornvorakul E, Janwantanakul P, van der Beek AJ. Effect of education on non-specific neck and low back pain: A meta-analysis of randomized controlled trials. Man Ther. 2016 Apr;22:31-41.</p> <p>Miyamoto GC, Lin CC, Cabral CMN, van Dongen JM, van Tulder MW. Cost-effectiveness of exercise therapy in the treatment of non-specific neck pain and low back pain: a systematic review with meta-analysis. Br J Sports Med. 2019 Feb;53(3):172-181.</p> |
| 22<br><a href="https://youtu.be/jdUYCN6Zb64">https://youtu.be/jdUYCN6Zb64</a> | P4Work   Low Back Pain classification                                                | <p>In this video you will learn about the specific pathologies associated with low back pain and clinical presentations, indicating the risk of severe pathology.</p> <p>This video is intended for a public audience who want to learn more about the topic.</p> | <p>Henschke N, Maher CG, Ostelo RW, de Vet HC, Macaskill P, Irwig L. Red flags to screen for malignancy in patients with low-back pain. Cochrane Database Syst Rev. 2013 Feb 28;(2):CD008686.</p> <p>Premkumar A, Godfrey W, Gottschalk MB, Boden SD. Red</p>                                                                                                                                                                                                                                                                                                                                                                                   |

| # Video & Link                                                                | Title                              | Description                                                                                                                                                                                                  | Inspired in the article                                                                                                                                                                                                                                                                                                                                                                                                                                                            |
|-------------------------------------------------------------------------------|------------------------------------|--------------------------------------------------------------------------------------------------------------------------------------------------------------------------------------------------------------|------------------------------------------------------------------------------------------------------------------------------------------------------------------------------------------------------------------------------------------------------------------------------------------------------------------------------------------------------------------------------------------------------------------------------------------------------------------------------------|
|                                                                               |                                    |                                                                                                                                                                                                              | Flags for Low Back Pain Are Not Always Really Red: A Prospective Evaluation of the Clinical Utility of Commonly Used Screening Questions for Low Back Pain. J Bone Joint Surg Am. 2018 Mar 7;100(5):368-374.                                                                                                                                                                                                                                                                       |
| 23<br><a href="https://youtu.be/aJFMfwPlcrM">https://youtu.be/aJFMfwPlcrM</a> | P4Work   Living with Chronic Pain  | In this video you will learn about how to optimize lifestyle in people with chronic pain.<br><br>This video is intended for a public audience who want to learn more about the topic.                        | Parikh P, Santaguida P, Macdermid J, Gross A, Eshtiaghi A. Comparison of CPG's for the diagnosis, prognosis and management of non-specific neck pain: a systematic review. BMC Musculoskelet Disord. 2019 Feb 14;20(1):81.                                                                                                                                                                                                                                                         |
| 24<br><a href="https://youtu.be/0btt6pf6JjM">https://youtu.be/0btt6pf6JjM</a> | P4Work   Working with Chronic Pain | In this video you will learn why work is a resource that should be maintained, even if working is not pain-free.<br><br>This video is intended for a public audience who want to learn more about the topic. | Cullen KL, Irvin E, Collie A, Clay F, Gensby U, Jennings PA, Hogg-Johnson S, Kristman V, Laberge M, McKenzie D, Newnam S, Palagyi A, Ruseckaite R, Sheppard DM, Shourie S, Steenstra I, Van Eerd D, Amick BC 3rd. Effectiveness of Workplace Interventions in Return-to-Work for Musculoskeletal, Pain-Related and Mental Health Conditions: An Update of the Evidence and Messages for Practitioners. J Occup Rehabil. 2018 Mar;28(1):1-15.<br><br>Norström, F., Waenerlund, AK., |

| # Video & Link                                                                | Title                              | Description                                                                                                                                                                                                                                   | Inspired in the article                                                                                                                                                                                                                                                                                                                                                                                                                                                                                                                                                                                                        |
|-------------------------------------------------------------------------------|------------------------------------|-----------------------------------------------------------------------------------------------------------------------------------------------------------------------------------------------------------------------------------------------|--------------------------------------------------------------------------------------------------------------------------------------------------------------------------------------------------------------------------------------------------------------------------------------------------------------------------------------------------------------------------------------------------------------------------------------------------------------------------------------------------------------------------------------------------------------------------------------------------------------------------------|
|                                                                               |                                    |                                                                                                                                                                                                                                               | Lindholm, L. et al. Does unemployment contribute to poorer health-related quality of life among Swedish adults?. BMC Public Health 19, 457 (2019).                                                                                                                                                                                                                                                                                                                                                                                                                                                                             |
| 25<br><a href="https://youtu.be/QWwM9a100Oc">https://youtu.be/QWwM9a100Oc</a> | P4Work   Epidemiology of Neck Pain | <p>In this video you will learn about the social and economic impact of neck pain and what are the statistics of neck pain on a global scale.</p> <p>This video is intended for a public audience who want to learn more about the topic.</p> | <p>Safiri S, Kolahi AA, Hoy D, Buchbinder R, Mansournia MA, Bettampadi D, Ashrafi-Asgarabad A, Almasi-Hashiani A, Smith E, Sepidarkish M, Cross M, Qorbani M, Moradi-Lakeh M, Woolf AD, March L, Collins G, Ferreira ML. Global, regional, and national burden of neck pain in the general population, 1990-2017: systematic analysis of the Global Burden of Disease Study 2017. BMJ. 2020 Mar 26;368:m791.</p> <p>Hallman DM, Holtermann A, Dencker-Larsen S, et al. Are trajectories of neck-shoulder pain associated with sick leave and work ability in workers? A 1-year prospective study. BMJ Open 2019;9:e022006.</p> |

| # Video & Link                                                                | Title                                                              | Description                                                                                                                                                                                                               | Inspired in the article                                                                                                                                                                                                       |
|-------------------------------------------------------------------------------|--------------------------------------------------------------------|---------------------------------------------------------------------------------------------------------------------------------------------------------------------------------------------------------------------------|-------------------------------------------------------------------------------------------------------------------------------------------------------------------------------------------------------------------------------|
| 26<br><a href="https://youtu.be/frMTiNSf7P4">https://youtu.be/frMTiNSf7P4</a> | P4Work   How to reduce Work-related Neck Pain                      | In this video you will learn about what physical exercises can be performed using a rubber band in order to reduce neck pain.<br><br>This video is intended for a public audience who want to learn more about the topic. | Parikh P, Santaguida P, Macdermid J, Gross A, Eshtiaghi A.<br>Comparison of CPG's for the diagnosis, prognosis and management of non-specific neck pain: a systematic review. BMC Musculoskelet Disord. 2019 Feb 14;20(1):81. |
| 27<br><a href="https://youtu.be/yIqUyw526Mo">https://youtu.be/yIqUyw526Mo</a> | P4Work   Is working good for you? (1): Health, work, and wellbeing | In this video you will learn about how work, health, and wellbeing may influence each other.<br><br>This video is intended for a public audience who want to learn more about the topic.                                  | Waddell G, Burton AK. Is work good for your health and wellbeing? The Stationery Office, London, UK. (2006) ISBN 9780117036949                                                                                                |
| 28<br><a href="https://youtu.be/tIy6mqMHZhg">https://youtu.be/tIy6mqMHZhg</a> | P4Work   Is working good for you? (2): Unemployment and health     | In this video you will learn about how unemployment can actually influence our mental and physical health.<br><br>This video is intended for a public audience who want to learn more about the topic.                    | Waddell G, Burton AK. Is work good for your health and wellbeing? The Stationery Office, London, UK. (2006) ISBN 9780117036949                                                                                                |
| 29<br><a href="https://youtu.be/qKNZT3RuCa0">https://youtu.be/qKNZT3RuCa0</a> | P4Work   Is working good for you? (3): Employment and health       | In this video you will learn about the benefits that meaningful employment has on our health.<br><br>This video is intended for a public audience who want to learn more about the topic.                                 | Waddell G, Burton AK. Is work good for your health and wellbeing? The Stationery Office, London, UK. (2006) ISBN 9780117036949                                                                                                |
| 30<br><a href="https://youtu.be/ywtIBLsoQHg">https://youtu.be/ywtIBLsoQHg</a> | P4Work   Is working good for you? (4): Re-employment and health    | In this video you will learn about the therapeutic effect of getting back into the workforce after a period of unemployment.                                                                                              | Waddell G, Burton AK. Is work good for your health and wellbeing? The Stationery Office, London, UK.                                                                                                                          |

| # Video & Link                                                                | Title                                                                              | Description                                                                                                                                                                                                                                                     | Inspired in the article                                                                                                         |
|-------------------------------------------------------------------------------|------------------------------------------------------------------------------------|-----------------------------------------------------------------------------------------------------------------------------------------------------------------------------------------------------------------------------------------------------------------|---------------------------------------------------------------------------------------------------------------------------------|
|                                                                               |                                                                                    | This video is intended for a public audience who want to learn more about the topic.                                                                                                                                                                            | (2006) ISBN 9780117036949                                                                                                       |
| 31<br><a href="https://youtu.be/wLuhGLFtelw">https://youtu.be/wLuhGLFtelw</a> | P4Work   Is working good for you? (5): Therapeutic effect for Musculoskeletal Pain | In this video you will learn about the benefits of employment and re-employment for people with musculoskeletal pain and why work should be considered therapeutic.<br><br>This video is intended for a public audience who want to learn more about the topic. | Waddell G, Burton AK. Is work good for your health and well-being? The Stationery Office, London, UK. (2006) ISBN 9780117036949 |

# BMJ Open

## EUROPEAN KNOWLEDGE ALLIANCE FOR INNOVATIVE MEASURES IN PREVENTION OF WORK-RELATED MUSCULOSKELETAL PAIN DISORDERS (PREVENT4WORK PROJECT): PROTOCOL FOR AN INTERNATIONAL MIXED METHODS LONGITUDINAL STUDY

|                                 |                                                                                                                                                                                                                                                                                                                                                                                                                                                                                                                                                                                                                                                                                                                                                                                                                                                                                                                                                                                                                                                                                                                                                                                                                                                                                         |
|---------------------------------|-----------------------------------------------------------------------------------------------------------------------------------------------------------------------------------------------------------------------------------------------------------------------------------------------------------------------------------------------------------------------------------------------------------------------------------------------------------------------------------------------------------------------------------------------------------------------------------------------------------------------------------------------------------------------------------------------------------------------------------------------------------------------------------------------------------------------------------------------------------------------------------------------------------------------------------------------------------------------------------------------------------------------------------------------------------------------------------------------------------------------------------------------------------------------------------------------------------------------------------------------------------------------------------------|
| Journal:                        | <i>BMJ Open</i>                                                                                                                                                                                                                                                                                                                                                                                                                                                                                                                                                                                                                                                                                                                                                                                                                                                                                                                                                                                                                                                                                                                                                                                                                                                                         |
| Manuscript ID                   | bmjopen-2021-052602.R1                                                                                                                                                                                                                                                                                                                                                                                                                                                                                                                                                                                                                                                                                                                                                                                                                                                                                                                                                                                                                                                                                                                                                                                                                                                                  |
| Article Type:                   | Protocol                                                                                                                                                                                                                                                                                                                                                                                                                                                                                                                                                                                                                                                                                                                                                                                                                                                                                                                                                                                                                                                                                                                                                                                                                                                                                |
| Date Submitted by the Author:   | 10-Aug-2021                                                                                                                                                                                                                                                                                                                                                                                                                                                                                                                                                                                                                                                                                                                                                                                                                                                                                                                                                                                                                                                                                                                                                                                                                                                                             |
| Complete List of Authors:       | Bellosta-López, Pablo; Universidad San Jorge, Department of Physiotherapy<br>Domenech-Garcia, Victor ; Universidad San Jorge, Department of Physiotherapy<br>Palsson, Thorvaldur; Aalborg University, Department of Health Science and Technology<br>Christensen, Steffan ; University College of Northern Denmark, Department of Physiotherapy; Aalborg University, SMI, Department of Health Science and Technology<br>Silva, Priscila de Brito; University College of Northern Denmark, Department of Physiotherapy<br>Langella, Francesco; IRCCS Istituto Ortopedico Galeazzi, Orthopedic & Traumatology<br>Berjano, P.; IRCCS Istituto Ortopedico Galeazzi,<br>Jensen, Palle Schlott; University College of Northern Denmark<br>Riis, Allan ; University College of Northern Denmark<br>Baroncini, Alice; IRCCS Istituto Ortopedico Galeazzi<br>Blasco-Abadía, Julia; Universidad San Jorge, Department of Physiotherapy<br>Jiménez-Sánchez, Carolina; Universidad San Jorge, Department of Physiotherapy<br>Calvo, Sandra; Universidad San Jorge, Department of Physiotherapy<br>Jaén-Carrillo, Diego; Universidad San Jorge<br>Herrero, Pablo; Universidad de Zaragoza, Fisiatría y Enfermería<br>Hoegh, Morten; Aalborg University, Department of Health Science and Technology |
| <b>Primary Subject Heading</b>: | Occupational and environmental medicine                                                                                                                                                                                                                                                                                                                                                                                                                                                                                                                                                                                                                                                                                                                                                                                                                                                                                                                                                                                                                                                                                                                                                                                                                                                 |
| Secondary Subject Heading:      | Public health                                                                                                                                                                                                                                                                                                                                                                                                                                                                                                                                                                                                                                                                                                                                                                                                                                                                                                                                                                                                                                                                                                                                                                                                                                                                           |
| Keywords:                       | OCCUPATIONAL & INDUSTRIAL MEDICINE, Musculoskeletal disorders < ORTHOPAEDIC & TRAUMA SURGERY, PAIN MANAGEMENT                                                                                                                                                                                                                                                                                                                                                                                                                                                                                                                                                                                                                                                                                                                                                                                                                                                                                                                                                                                                                                                                                                                                                                           |
|                                 |                                                                                                                                                                                                                                                                                                                                                                                                                                                                                                                                                                                                                                                                                                                                                                                                                                                                                                                                                                                                                                                                                                                                                                                                                                                                                         |

1  
2  
3  
4  
5  
6  
7  
8  
9  
10  
11  
12  
13  
14  
15  
16  
17  
18  
19  
20  
21  
22  
23  
24  
25  
26  
27  
28  
29  
30  
31  
32  
33  
34  
35  
36  
37  
38  
39  
40  
41  
42  
43  
44  
45  
46  
47  
48  
49  
50  
51  
52  
53  
54  
55  
56  
57  
58  
59  
60

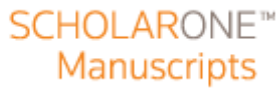





I, the Submitting Author has the right to grant and does grant on behalf of all authors of the Work (as defined in the below author licence), an exclusive licence and/or a non-exclusive licence for contributions from authors who are: i) UK Crown employees; ii) where BMJ has agreed a CC-BY licence shall apply, and/or iii) in accordance with the terms applicable for US Federal Government officers or employees acting as part of their official duties; on a worldwide, perpetual, irrevocable, royalty-free basis to BMJ Publishing Group Ltd ("BMJ") its licensees and where the relevant Journal is co-owned by BMJ to the co-owners of the Journal, to publish the Work in this journal and any other BMJ products and to exploit all rights, as set out in our [licence](#).

The Submitting Author accepts and understands that any supply made under these terms is made by BMJ to the Submitting Author unless you are acting as an employee on behalf of your employer or a postgraduate student of an affiliated institution which is paying any applicable article publishing charge ("APC") for Open Access articles. Where the Submitting Author wishes to make the Work available on an Open Access basis (and intends to pay the relevant APC), the terms of reuse of such Open Access shall be governed by a Creative Commons licence – details of these licences and which [Creative Commons](#) licence will apply to this Work are set out in our licence referred to above.

Other than as permitted in any relevant BMJ Author's Self Archiving Policies, I confirm this Work has not been accepted for publication elsewhere, is not being considered for publication elsewhere and does not duplicate material already published. I confirm all authors consent to publication of this Work and authorise the granting of this licence.

1  
2  
3 **Original paper for BMJ Open**  
4  
5

6 **EUROPEAN KNOWLEDGE ALLIANCE FOR INNOVATIVE MEASURES IN**  
7  
8 **PREVENTION OF WORK-RELATED MUSCULOSKELETAL PAIN**  
9  
10 **DISORDERS (PREVENT4WORK PROJECT): PROTOCOL FOR AN**  
11  
12 **INTERNATIONAL MIXED METHODS LONGITUDINAL STUDY**  
13  
14  
15  
16

17 Authors:

- 18 1. Pablo, BELLOSTA-LÓPEZ<sup>1</sup> – PBL  
19 2. Víctor, DOMÉNECH-GARCÍA<sup>1</sup> –VDG  
20  
21 ● Thorvaldur Skuli, PALSSON<sup>2</sup> – TSP  
22  
23 ● Steffan Wittrup McPhee, CHRISTENSEN<sup>2-3</sup> - SWMC  
24  
25 ● Priscila de Brito, SILVA<sup>3</sup> – PBS  
26  
27 ● Francesco, LANGELLA<sup>4</sup> – FL  
28  
29 ● Pedro, BERJANO<sup>4</sup> – PB  
30  
31 ● Palle Schlott, JENSEN<sup>3</sup> - PSJ  
32  
33 ● Allan, RIIS<sup>3,5</sup> - AR  
34  
35 ● Alice, BARONCINI<sup>4</sup> – AB  
36  
37 ● Julia, BLASCO-ABADÍA<sup>1</sup> - JBA  
38  
39 ● Carolina, JIMÉNEZ-SÁNCHEZ<sup>1</sup> - CJS  
40  
41 ● Sandra, CALVO<sup>1</sup> – SC  
42  
43 ● Diego, JAÉN-CARRILLO<sup>1</sup> - DJC  
44  
45 ● Pablo, HERRERO<sup>6</sup> – PH

46 Last author: Morten, HOEGH<sup>2</sup> - MH

47 On behalf of "Prevent 4 Work" Study Group  
48  
49  
50  
51

52 **Corresponding author:** Víctor Doménech-García, Universidad San Jorge. Campus  
53 Universitario, Autov. A23, Km 299, 50830 Villanueva de Gállego, Zaragoza, Spain. Tel.:  
54 (+34) 976 060 100 Fax.: 976 077 581. Email: [vdomenech@usj.es](mailto:vdomenech@usj.es)  
55  
56  
57  
58  
59  
60

## Affiliations

<sup>1</sup>Universidad San Jorge. Campus Universitario, Autov. A23 km 299, 50830. Villanueva de Gállego, Zaragoza, Spain.

<sup>2</sup>Department of Health Science and Technology, Aalborg University, Aalborg, Denmark

<sup>3</sup>Department of Physiotherapy, University College of Northern Denmark, Aalborg, Denmark.

<sup>4</sup>IRCCS Istituto Ortopedico Galeazzi, Milan, Italy.

<sup>5</sup>The Research Unit for General Practice in Aalborg, Aalborg University, Aalborg, Denmark.

<sup>6</sup>Department of Physiatry and Nursing, Faculty of Health Sciences, University of Zaragoza, Zaragoza, Spain.

## ABSTRACT

### Introduction

Work-related musculoskeletal (MSK) pain is a highly prevalent condition and one of the main contributors to disability and loss of work capacity. Current approaches to the management and prevention of work-related MSK pain do not consistently integrate current evidence-based knowledge and seem to be outdated. The Prevent4Work (P4W) project aims to collect and spread evidence-based information to improve the management and prevention of work-related MSK pain. P4W will longitudinally investigate i) risk factors associated with the prevalence of work-related MSK pain, ii) predictive factors for new events of work-related MSK pain in the short term, and iii) the modification of pain beliefs after participating in evidence-based e-learning courses.

### Methods and analysis

This project employs a mixed-methods design with international cohorts of workers from Spain, Italy, and Denmark. All participants will be assessed using self-reported variables at baseline (i.e., cross-sectional design) with follow-up after 3 and 6-months (i.e., prospective-predictive design). Throughout the first phase (0-3 months), all participants will be offered to self-enroll in e-learning courses on work-related MSK pain. Changes in pain beliefs (if any) will be assessed. The dataset will include sociodemographic characteristics, physical and psychological job demands, lifestyle-related factors, MSK pain history, and pain beliefs. At baseline, all participants will additionally complete the P4W questionnaire developed to detect populations at high risk of suffering work-related MSK pain.

Descriptive statistics, binary logistic regression, and analysis of variance will be used to identify the significant factors that influence the history of work-related MSK pain, evaluate the short-term prediction capacity of the P4W questionnaire, and

1  
2 investigate whether workers' participation in e-learning courses will modify their pain  
3 beliefs.  
4  
5  
6  
7  
8

### 9 **Ethics and dissemination**

10  
11 The study received ethical approval from the Ethical Committee of San Jorge University  
12 (USJ011-19/20). The results will be made available via peer-reviewed publications,  
13 international conferences and Prevent4Work official channels.  
14  
15  
16  
17  
18

### 19 **Strengths and limitations of this study**

- 20  
21 • Large multicenter study examining risk factors associated with work-related MSK  
22 pain in three different European countries.
- 23  
24 • Comprehensive multidimensional assessment of workers is conducted.
- 25  
26 • A prospective design protocol which allows to investigate the temporal dynamics  
27 of work-related MSK pain.
- 28  
29 • Only short-term follow-up is conducted.
- 30  
31 • Only self-reported variables but no subject-independent measures are obtained.  
32  
33  
34  
35  
36  
37  
38  
39  
40  
41  
42  
43

### 44 **Key Words:**

45  
46 Occupational & Industrial medicine, Musculoskeletal Disorders, Pain Management.  
47  
48  
49  
50  
51  
52  
53  
54  
55  
56  
57  
58  
59  
60

## **INTRODUCTION**

Work-related musculoskeletal (MSK) pain refers to pain related to or leading to work-related disability.<sup>1</sup> The level of disability can range from low to high and be episodic or persistent, thus reducing workers' quality of life and work capacity.<sup>2</sup> Self-reported pain in the neck and low back is the main complaint of workers reporting interfering pain.<sup>3</sup> According to the Sixth European Working Conditions Survey, 40% of workers report one event of pain per year, while 20% report having a chronic pain condition.<sup>4</sup>

Work-related MSK pain is a complex condition, consisting of multiple interacting factors such as i) physical factors (e.g., manual handling, working in awkward postures, repetitive work, and working at high speed), ii) individual factors (e.g., stress exposure, health beliefs, beliefs about pain, sleep quality, social support), iii) contextual factors (e.g., workplace design and organization) and, iv) sociodemographic factors (e.g., level of education, age).<sup>5</sup>

The incidence and prevalence rates of work-related MSK pain are increasing world-wide, which may indicate a sub-optimal effect of contemporary approaches for its management.<sup>6</sup> Insufficient implementation of evidence-based practice might be the primary contributor,<sup>7</sup> although outdated education of health care professionals and low-value treatments are also barriers for optimal management of work-related MSK pain.<sup>8 9</sup>

Previous, large-scale initiatives have demonstrated that educational interventions can modify pain beliefs among workers.<sup>10</sup> Therefore, given that outdated beliefs and expectations about health are associated with a higher risk of work-related MSK pain<sup>11</sup> and potentially with chronicity and disability,<sup>12</sup> educational interventions could be an ideal starting point. However, the impact of changes in pain beliefs on reducing new events and/or chronicity of work-related MSK pain has not yet been investigated.

### **Prevent4Work project:**

The European Knowledge Alliance "Prevent4Work" (P4W) project aims to provide high-quality education for professionals and laypeople focusing on work-related MSK pain. This initiative is intended to improve work-related MSK pain management strategies by developing and implementing new assessment and interactive digital platforms. A part of this initiative is the risk assessment questionnaire (P4W questionnaire) has recently been developed to detect populations at high risk of suffering work-related MSK pain.<sup>13</sup> Moreover, innovative educational programs will be introduced, and adaptive mobile interactive digital platforms, capable of delivering evidence-based information and collect data will be continuously developed (Supplemental Table 1).

The research-specific aims of the P4W project are i) to identify risk factors associated with the prevalence and/or the incidence of work-related MSK pain, ii) to evaluate the predictive capacity of the P4W questionnaire for new events of work-related MSK pain in the short term (i.e., three and six months), iii) to evaluate whether pain beliefs are modified in the short term after participating in e-learning evidence-based training activities about work-related MSK pain.

It has been suggested that the pandemic situation related to COVID-19 has had a significant negative effect on the physical and mental wellbeing of people with chronic pain.<sup>14</sup> Additionally, there is insufficient data on how/if the COVID-19 pandemic causes new events or flare-ups of pain across the successive waves of contagion.<sup>15</sup> Therefore, the project will explore potential relationships with the development of new events of self-reported work-related MSK pain.

## **METHODS**

The present study protocol complies with the Strengthening the Reporting of Observational Studies in Epidemiology (STROBE) recommendations.<sup>16</sup>

### **Study design**

This study protocol will follow a longitudinal mixed-methods design with international cohorts. All participants will be assessed by using self-reported variables at baseline (i.e., cross-sectional study design) with follow-up at 3 and 6-months (i.e., prospective-predictive study design). Throughout the first phase (0-3 months), all participants will be offered to self-enroll in a free-learning course about work-related MSK pain. The analysis of data will be performed following a pragmatic study design (see figure 1).

FIGURE 1 HERE

### **Population**

The cohort will be composed of people in employment between 18 and 65 years of age, from Denmark, Italy, and Spain, who are fluent in either English, Danish, Italian, or Spanish, who have an easy access to a tablet/smartphone and internet. No specific exclusion criteria will be considered to be enrolled in the study. In the event of an enrolled participant changing the initial job position or taking any sort of long-term leave during the study period, he/she will be excluded from the follow-up analysis.

### **Contact and recruitment**

Companies, institutions, and workers associations from Denmark, Italy, and Spain are invited to participate in P4W actions via the P4W network. Each organization will provide their workers information in the local language together with two animated videos (also



1  
2  
3 in the local language) explaining the aims and actions of the P4W project. The participants  
4  
5 recruited through here will provide data that will enable an evaluation of risk factors  
6  
7 associated with work-related MSK pain. Likewise, their participation in the P4W e-  
8  
9 learning courses about work-related MSK pain will allow for an evaluation of the content  
10  
11 from a user perspective. Participating organizations will be assigned a national liaison for  
12  
13 first-line support.  
14  
15  
16  
17

### 18 **Data collection and security measures**

19  
20 Data collection will be conducted between April and December 2021. When registering  
21  
22 in the application for mobile devices (app), participants will have to accept the informed  
23  
24 consent before they get a personal account. Two reminder messages will appear within  
25  
26 the main panel of the app, with the first one notifying which institution is leading the  
27  
28 project in their country of residence while the second will be a reminder of that the survey  
29  
30 and P4W questionnaire is ready to be completed.  
31  
32  
33

34 All personal and survey data will be stored with record-level encryption at the  
35  
36 database level, meaning that it is incomprehensible without first being decrypted.  
37  
38 Moreover, the survey data will be pseudo-anonymized, so it is impossible to relate the  
39  
40 physical person and with their data directly. For processing and exporting purposes, all  
41  
42 data will be conveniently anonymized in a way that each data record is generated with a  
43  
44 unique identifier that is not possible to relate with the physical person and its personal  
45  
46 information.  
47  
48  
49

50 All the measures will be conducted to comply with EU's General Data Protection  
51  
52 Regulation <sup>17</sup> and implemented following recommended guidelines.<sup>18 19</sup>  
53  
54  
55  
56  
57  
58  
59  
60

### **P4W courses**

All participants can choose to participate in one or more e-learning courses. The P4W study group published a scoping review on the role of education in preventing and treating work-related MSK pain, finding that there is a basis for using education to complement other treatments.<sup>1</sup> Here, participants can access animated videos with essential messages from systematic reviews on work-related MSK pain which have been produced specifically in relation to the project (Supplemental Table 2). The videos were developed in English and Spanish languages, with Italian or Danish subtitles and are publicly available at <https://p4work.com/results/> (retrieved on 31<sup>st</sup> March 2021). For further analysis, all participants that have been invited to take the courses will be classified based to their interaction with the animated videos as: i) No participation at all, ii) Visualization of videos in isolation / Starting, but not finishing an e-learning course, iii) Completion of one or more entire learning courses.

### **Outcome measures**

Table 1 summarizes outcome domains over the length of the study. Specific outcomes measures are presented in detail afterward.

**Table 1.** Summary of outcome domains assessed over the length of the study, including risk factors potentially associated with prevalence and/or incidence of work-related MSK pain.

| Period   | Domains                                                                                                                                                                                                                      |
|----------|------------------------------------------------------------------------------------------------------------------------------------------------------------------------------------------------------------------------------|
| Baseline | <ul style="list-style-type: none"> <li>● P4W survey               <ul style="list-style-type: none"> <li>○ Individual factors</li> <li>○ Job demands</li> <li>○ Lifestyle</li> <li>○ MSK pain history</li> </ul> </li> </ul> |

|                          |                                                                                                                                                                                                                                                                               |
|--------------------------|-------------------------------------------------------------------------------------------------------------------------------------------------------------------------------------------------------------------------------------------------------------------------------|
|                          | <ul style="list-style-type: none"> <li>○ COVID-19</li> <li>○ Pain Beliefs</li> <li>○ Work-related MSK pain training experience and interests</li> <li>● P4W questionnaire</li> </ul>                                                                                          |
| 3- and 6-month follow-up | <ul style="list-style-type: none"> <li>● P4W follow-up survey</li> <li>○ Verification of same job position</li> <li>○ Verification of e-learning course participation</li> <li>○ Lifestyle</li> <li>○ MSK pain history</li> <li>○ COVID-19</li> <li>○ Pain Beliefs</li> </ul> |

### **Baseline**

At baseline, all participants will complete a survey composed of 5 sections:

*Section 1:* This section will collect sociodemographic and personal information such as age, sex, weight, height, education level, job position and seniority.

*Section 2:* This section will collect information about job demands at different levels such as physical demand, psychological demand, and decision capacity. Each domain is composed of different questions assessed on a 5-item Likert scale. The average scores of the different questions in each domain are classified as being in "high demand", "medium demand" or "low demand".<sup>20</sup> Following the same structure, four additional categories will be assessed in the P4W survey: "sustained postures", "repetitive movement", "overstrain", and "overtime".

1  
2  
3 *Section 3:* This section will collect information about lifestyle (physical activity out  
4 of work, sleep quality and quantity), medical history of MSK pain (including onset  
5 e.g., whiplash injury due to a car accident) and COVID-19 impact.  
6  
7

- 8  
9 • **Physical activity** in leisure time will be evaluated by using the Global  
10 Physical Activity Questionnaire<sup>21</sup> proposed by the World Health  
11 Organization. Participants will be asked to indicate the number of days (if  
12 any) in a typical week and the average time in a day (in hours and minutes)  
13 they spend doing such type of moderate or vigorous intensity activities.  
14
- 15 • **Sleep quality** will be evaluated by using the Medical Outcomes Study Sleep  
16 Scale.<sup>22</sup> Specifically, the sleep adequacy domain, composed of only 2  
17 questions, will be assessed. This domain is rated on a 6-item Likert scale, and  
18 the average of the two questions is transformed to a percentage. **Sleep**  
19 **quantity** will be assessed by asking for the average number of hours slept per  
20 night during the last 4 weeks.  
21
- 22 • **Prevalence and history of self-reported work-related MSK pain** will be  
23 evaluated using the extended version of the Nordic Musculoskeletal  
24 Questionnaire.<sup>23</sup> The original 9 body regions in the original scale will be  
25 reduced to 4 (neck pain, low back pain, upper limb pain and lower limb pain).  
26 As part of the extended version, medication consumption, use of health  
27 services (physiotherapist, doctor, etc.) and difficulties to carry out work tasks,  
28 will be registered to evaluate the impact of MSK pain in workers.  
29
- 30 • **COVID-19 impact** will be explored as a potential contributor to developing  
31 or aggravating MSK pain<sup>15</sup> by using supplementary, ad hoc questions.  
32  
33  
34  
35  
36  
37  
38  
39  
40  
41  
42  
43  
44  
45  
46  
47  
48  
49  
50  
51  
52  
53  
54  
55  
56  
57

58 *Section 4:* Information about beliefs related to the cause and treatment of pain are  
59 collected using the Pain Beliefs Questionnaire.<sup>24</sup> The Pain Beliefs Questionnaire is a  
60

1  
2  
3 12-item questionnaire with a 6-point Likert scale that taps into the two dimensions  
4  
5 of pain beliefs (organic and psychological beliefs).  
6  
7

8  
9 *Section 5:* This section will collect information about the participants' training  
10  
11 experience and interests in the field of work-related MSK pain. The different topics  
12  
13 are based on the current management of work-related MSK pain and the latest  
14  
15 evidence regarding factors and interventions that can contribute to increase or  
16  
17 decrease the risk of suffering work-related MSK pain.<sup>5</sup>  
18  
19

20  
21  
22  
23 *Prevent4Work Questionnaire:* All workers will complete the P4W questionnaire. This  
24  
25 self-perceived risk assessment questionnaire was developed to detect populations at high  
26  
27 risk of work-related MSK pain.<sup>13</sup> The instrument uses a biopsychosocial approach based  
28  
29 on 20 items with a 5-point Likert scale which investigates four different domains:  
30  
31 Physical Stress, Mental Stress, Job Satisfaction and Kinesiophobia.  
32  
33

### 34 35 36 37 **Follow-up at 3 and 6 months**

38  
39 At follow-up (3 and 6-months), all participants will receive a short version of the survey  
40  
41 conducted at baseline. This short version of the survey will be composed of i) a specific  
42  
43 question to ensure the participant is performing the same job and type of work as baseline  
44  
45 level, ii) a specific self-reported question related to the participation in e-learning courses,  
46  
47 iii) a short version of the Nordic Musculoskeletal Questionnaire regarding the experience  
48  
49 of new events of self-reported MSK pain in the last 3-6 months, and iv) the Pain Beliefs  
50  
51 Questionnaire.  
52  
53

54  
55 Data from the 3-month follow-up will be used to evaluate any potential change in  
56  
57 pain beliefs, whilst 6-month follow-up will be used to test the short-term prediction  
58  
59  
60

1  
2  
3 capacity of the P4W questionnaire for new events of MSK pain (at the neck, low back,  
4  
5 upper limb, or lower limb) within the cohort of workers.  
6  
7  
8

### 9 **Sample size**

10  
11 The present large-scale project needs to reach a sample of 1.500 workers to meet the  
12  
13 European Commission requirements and analyze the current risk factors for MSK pain.  
14  
15 This sample size is estimated to be valid to test the short-term prediction capacity of P4W  
16  
17 questionnaire for a new event of self-reported MSK pain based on performing a binary  
18  
19 logistic regression.<sup>25</sup> Under these circumstances, at least 331 workers should be followed-  
20  
21 up at 6 months in order to evaluate the predictive capacity of 10 candidate variables with  
22  
23 an incidence expectation of 15±5% for a new episode of self-reported MSK pain.<sup>26 27</sup>  
24  
25 Additionally, the sample size (n>158) will allow for detecting small to medium  
26  
27 differences within workers in the Pain Beliefs Questionnaire (Cohen's effect size d=  
28  
29 0.26)<sup>28</sup> with an alfa error of 0.05 and a power of 90%.  
30  
31  
32  
33  
34  
35  
36

### 37 **Statistical analysis**

38  
39 In relation to the first aim, linked to the cross-sectional study, multiclass or binary logistic  
40  
41 regression will be applied to identify the major factors that influence the presence and/or  
42  
43 recent history of work-related MSK pain. In relation to the second aim, linked to the  
44  
45 cohort study, binary logistic regression will be used to evaluate the short-term prediction  
46  
47 capacity of the P4W questionnaire with regards to the appearance of a new MSK pain  
48  
49 event in the past 6 months according to the Nordic Musculoskeletal Questionnaire. In  
50  
51 relation to the third aim, linked to the pragmatic study, repeated measures analysis of  
52  
53 variance will be used to determine if workers' participation in e-learning courses modifies  
54  
55 their pain beliefs. The analysis will be conducted under the intention-to-treat and per-  
56  
57 protocol principles, and the effect sizes will be reported for a better interpretation and  
58  
59  
60

1  
2  
3 controlling the risk of type-1 error. The significance level will be established for all the  
4  
5 analyses at  $P < 0.05$ .  
6  
7  
8

### 9 **Ethics and confidentiality**

10  
11 The study protocol has been approved by the ethical committee at San Jorge University  
12 (USJ011-19/20). Each participant will be automatically assigned a study code when  
13  
14 registering on the app. This code will be the only downloadable information together with  
15  
16 health data by study researchers. All personal data needed for registration will be saved  
17  
18 in an independent database, which will only be accessible by the principal investigator  
19  
20 and study coordinators in each country. Any deviation from the current protocol will be  
21  
22 explained and justified if necessary.  
23  
24  
25  
26  
27  
28  
29

### 30 **Dissemination**

31  
32 The results, regardless of the outcome, will be made available via peer-reviewed  
33  
34 publications in open-source journals, relevant international conferences within the field  
35  
36 of pain and occupational health, and via P4W official channels, such as the P4W website,  
37  
38 social media channels, and final project symposium. Results will likewise be  
39  
40 disseminated by producing new high-quality videos on the P4W YouTube channel.  
41  
42  
43  
44  
45  
46  
47

### 48 **REFERENCES**

- 49  
50 1. Palsson TS, Boudreau S, Høgh M, et al. Education as a strategy for managing  
51  
52 occupational-related musculoskeletal pain: a scoping review. *BMJ Open*  
53  
54 2020;**10**(2):e032668.  
55  
56  
57  
58  
59  
60

- 1  
2  
3 2. Chang YF, Yeh CM, Huang SL, et al. Work Ability and Quality of Life in Patients  
4  
5 with Work-Related Musculoskeletal Disorders. *Int J Environ Res Public Health*  
6  
7 2020;**17**(9)  
8
- 9  
10 3. de Kok J, Vroonhof P, Snijders J, et al. Work-related musculoskeletal disorders:  
11  
12 prevalence, costs and demographics in the EU. Luxembourg: European Agency  
13  
14 for Safety and Health at Work 2019. Available:  
15  
16 [https://osha.europa.eu/sites/default/files/publications/documents/Work-  
19  
20 related\\_MSDs\\_prevalence\\_costs\\_and\\_demographics\\_in\\_the\\_EU\\_report.pdf](https://osha.europa.eu/sites/default/files/publications/documents/Work-<br/>17<br/>18 related_MSDs_prevalence_costs_and_demographics_in_the_EU_report.pdf)
- 21  
22 4. Parent-Thirion A, Biletta I, Cabrita J, et al. Sixth European Working Conditions Survey  
23  
24 – Overview report (2017 update). Luxembourg: European Foundation for the  
25  
26 Improvement of Living and Working Conditions 2017. Available:  
27  
28 [https://www.eurofound.europa.eu/sites/default/files/ef\\_publication/field\\_ef\\_doc  
31  
32 ument/ef1634en.pdf](https://www.eurofound.europa.eu/sites/default/files/ef_publication/field_ef_doc<br/>29<br/>30 ument/ef1634en.pdf)
- 33  
34 5. Isusi I. Work-related musculoskeletal disorders – Facts and figures. Luxembourg:  
35  
36 European Agency for Safety and Health at Work 2020. Available:  
37  
38 [https://osha.europa.eu/sites/default/files/publications/documents/Work\\_related\\_  
41  
42 musculoskeletal\\_disorders\\_%20Facts\\_and\\_figures.pdf](https://osha.europa.eu/sites/default/files/publications/documents/Work_related_<br/>39<br/>40 musculoskeletal_disorders_%20Facts_and_figures.pdf)
- 43  
44 6. Crawford JO, Davis A. Work-related musculoskeletal disorders: why are they still so  
45  
46 prevalent? Evidence from a literature review. Luxembourg: European Agency for  
47  
48 Safety and Health at Work 2020. Available:  
49  
50 [https://osha.europa.eu/sites/default/files/publications/documents/Work\\_related\\_  
53  
54 musculoskeletal\\_disorders\\_why\\_so\\_prevalent\\_report.pdf](https://osha.europa.eu/sites/default/files/publications/documents/Work_related_<br/>51<br/>52 musculoskeletal_disorders_why_so_prevalent_report.pdf)
- 55  
56 7. Buchbinder R, Underwood M, Hartvigsen J, et al. The Lancet Series call to action to  
57  
58 reduce low value care for low back pain: an update. *Pain* 2020;**161** **Suppl**  
59  
60 **1**(1):S57-S64.



- 1  
2  
3 8. Foster NE, Anema JR, Cherkin D, et al. Prevention and treatment of low back pain:  
4  
5 evidence, challenges, and promising directions. *Lancet* 2018;**391**(10137):2368-  
6  
7 83.  
8
- 9  
10 9. Slade SC, Kent P, Patel S, et al. Barriers to Primary Care Clinician Adherence to  
11  
12 Clinical Guidelines for the Management of Low Back Pain: A Systematic Review  
13  
14 and Metasynthesis of Qualitative Studies. *Clin J Pain* 2016;**32**(9):800-16.  
15
- 16  
17 10. Andersen LL, Geisle N, Knudsen B. Can beliefs about musculoskeletal pain and work  
18  
19 be changed at the national level? Prospective evaluation of the Danish national  
20  
21 Job & Body campaign. *Scand J Work Environ Health* 2018;**44**(1):25-36.  
22
- 23  
24 11. Vargas-Prada S, Coggon D. Psychological and psychosocial determinants of  
25  
26 musculoskeletal pain and associated disability. *Best Pract Res Clin Rheumatol*  
27  
28 2015;**29**(3):374-90.  
29
- 30  
31 12. Coggon D, Ntani G, Palmer KT, et al. Disabling musculoskeletal pain in working  
32  
33 populations: is it the job, the person, or the culture? *Pain* 2013;**154**(6):856-63.  
34
- 35  
36 13. Langella F, Christensen SWM, Palsson TS, et al. Development of the Prevent for  
37  
38 Work questionnaire (P4Wq) for assessment of musculoskeletal risk in the  
39  
40 workplace: part 1-literature review and domains selection. *BMJ Open*  
41  
42 2021;**11**(4):e043800.  
43
- 44  
45 14. Carrillo-de-la-Peña MT, González-Villar A, Triñanes Y. Effects of the COVID-19  
46  
47 pandemic on chronic pain in Spain: a scoping review. *Pain Rep* 2021;**6**(1):e899.  
48
- 49  
50 15. Cipollaro L, Giordano L, Padulo J, et al. Musculoskeletal symptoms in SARS-CoV-  
51  
52 2 (COVID-19) patients. *J Orthop Surg Res* 2020;**15**(1):178.  
53
- 54  
55 16. von Elm E, Altman DG, Egger M, et al. Strengthening the Reporting of Observational  
56  
57 Studies in Epidemiology (STROBE) statement: guidelines for reporting  
58  
59 observational studies. *BMJ* 2007;**335**(7624):806-8.  
60

- 1  
2  
3 17. Regulation (EU) 2016/679 of the European Parliament and of the Council of 27 April  
4  
5 2016 on the protection of natural persons with regard to the processing of personal  
6  
7 data and on the free movement of such data, and repealing Directive 95/46/EC  
8  
9 (General Data Protection Regulation). *Official Journal of the European Union*  
10  
11 2016;**119**(1)  
12  
13
- 14 18. Agencia Española de Protección de Datos A. Orientaciones y garantías en los  
15  
16 procedimientos de anonimización de datos personales. 2016. Available:  
17  
18 [https://www.aepd.es/sites/default/files/2019-09/guia-orientaciones-](https://www.aepd.es/sites/default/files/2019-09/guia-orientaciones-procedimientos-anonimizacion.pdf)  
19  
20 [procedimientos-anonimizacion.pdf](https://www.aepd.es/sites/default/files/2019-09/guia-orientaciones-procedimientos-anonimizacion.pdf)  
21  
22
- 23 19. Agencia Española de Protección de Datos A. Guía del Reglamento General de  
24  
25 Protección de Datos para responsables de tratamiento. 2016. Available:  
26  
27 [https://www.aepd.es/sites/default/files/2019-09/guia-rgpd-para-responsables-de-](https://www.aepd.es/sites/default/files/2019-09/guia-rgpd-para-responsables-de-tratamiento.pdf)  
28  
29 [tratamiento.pdf](https://www.aepd.es/sites/default/files/2019-09/guia-rgpd-para-responsables-de-tratamiento.pdf)  
30  
31
- 32 20. Cantley LF, Tessier-Sherman B, Slade MD, et al. Expert ratings of job demand and  
33  
34 job control as predictors of injury and musculoskeletal disorder risk in a  
35  
36 manufacturing cohort. *Occup Environ Med* 2016;**73**(4):229-36.  
37  
38
- 39 21. Wanner M, Hartmann C, Pestoni G, et al. Validation of the Global Physical Activity  
40  
41 Questionnaire for self-administration in a European context. *BMJ Open Sport*  
42  
43 *Exerc Med* 2017;**3**(1):e000206.  
44  
45
- 46 22. Hays RD, Martin SA, Sesti AM, et al. Psychometric properties of the Medical  
47  
48 Outcomes Study Sleep measure. *Sleep medicine* 2005;**6**(1):41-4.  
49  
50
- 51 23. Dawson AP, Steele EJ, Hodges PW, et al. Development and test-retest reliability of  
52  
53 an extended version of the Nordic Musculoskeletal Questionnaire (NMQ-E): a  
54  
55 screening instrument for musculoskeletal pain. *The journal of pain : official*  
56  
57 *journal of the American Pain Society* 2009;**10**(5):517-26.  
58  
59  
60

- 1  
2  
3 24. Edwards LC, Pearce SA, Turner-Stokes L, et al. The Pain Beliefs Questionnaire: an  
4 investigation of beliefs in the causes and consequences of pain. *Pain*  
5 1992;**51**(3):267-72.  
6  
7  
8  
9 25. Riley RD, Ensor J, Snell KIE, et al. Calculating the sample size required for  
10 developing a clinical prediction model. *BMJ* 2020;**368**:m441.  
11  
12  
13 26. Ostergren PO, Hanson BS, Balogh I, et al. Incidence of shoulder and neck pain in a  
14 working population: effect modification between mechanical and psychosocial  
15 exposures at work? Results from a one year follow up of the Malmö shoulder and  
16 neck study cohort. *J Epidemiol Community Health* 2005;**59**(9):721-8.  
17  
18  
19 27. Vargas-Prada S, Serra C, Martínez JM, et al. Psychological and culturally-influenced  
20 risk factors for the incidence and persistence of low back pain and associated  
21 disability in Spanish workers: findings from the CUPID study. *Occup Environ*  
22 *Med* 2013;**70**(1):57-62.  
23  
24 28. Baird AJ, Haslam RA. Exploring differences in pain beliefs within and between a  
25 large nonclinical (workplace) population and a clinical (chronic low back pain)  
26 population using the pain beliefs questionnaire. *Phys Ther* 2013;**93**(12):1615-24.  
27  
28  
29  
30  
31  
32  
33  
34  
35  
36  
37  
38  
39

#### **FIGURE LEGEND**

40  
41  
42 **Figure 1.** Study timeline design.  
43  
44  
45  
46

#### **TABLE LEGEND**

47  
48  
49 **Table 1.** Summary of outcome domains assessed over the length of the study, including  
50 risk factors potentially associated with prevalence and/or incidence of work-related  
51 MSK pain.  
52  
53  
54  
55  
56  
57  
58  
59  
60

## **DECLARATIONS**

### **Authors' contributions**

All authors contributed significantly to the design of this study protocol and conformed to the requirements of the International Committee of Medical Journal Editors (ICMJE). PBL, VDG, TSP, SWMC, PBS, FL, PB, PH and MH contributed to the conception and planning of the study protocol. PBL, VDG, TSP, PBS, AR, PB and MH contributed to the acquisition of the data for the work. PBL, VDG, TSP, SWMC, PBS, PSJ, FL, PB, AB, JBA, CJS, SC, DJC, PH and MH contributed to the development of educational content and evaluation tools. All authors contributed to writing the article and have read and approved the final manuscript.

### **Funding**

This study was funded by Erasmus+ Program (agreement no. 2018-2381/001-001, project no.19 600920-EPP-1-2018-1-ES-EPPKA2-KA). PBL has been supported during the elaboration of the present work by the Grant CPB09/18 from "Gobierno de Aragón" and co-financed by "Programa Operativo FSE Aragón 2014-2020, Construyendo Europa desde Aragón" and the Grant FPU19/05237. FL, PB and AB are supported by the Italian Ministry of Health (agreement number not applicable). The funders did not have any role in this study.

### **Competing interests**

None declared.

### **Patient and public involvement**

Patients and/or the public were not involved in the design, or conduct, or reporting, or dissemination plans of this research.

1  
2  
3  
4  
5 **Patient consent for publication**  
6

7 Not required.  
8  
9

10  
11  
12 **Provenance and peer review**  
13

14 Not commissioned, externally peer reviewed.  
15  
16

17  
18  
19 **Word Count:** 2,291  
20  
21  
22  
23  
24  
25  
26  
27  
28  
29  
30  
31  
32  
33  
34  
35  
36  
37  
38  
39  
40  
41  
42  
43  
44  
45  
46  
47  
48  
49  
50  
51  
52  
53  
54  
55  
56  
57  
58  
59  
60

1  
2  
3  
4  
5  
6  
7  
8  
9  
10  
11  
12  
13  
14  
15  
16  
17  
18  
19  
20  
21  
22  
23  
24  
25  
26  
27  
28  
29  
30  
31  
32  
33  
34  
35  
36  
37  
38  
39  
40  
41  
42  
43  
44  
45  
46  
47  
48  
49  
50  
51  
52  
53  
54  
55  
56  
57  
58  
59  
60



Figure 1. Study timeline design  
170x230mm (300 x 300 DPI)

**Supplemental table 1.** List of P4W links resources: innovative educational programs and adaptive mobile interactive digital platforms for delivering evidence-based information and collecting data.

| <b>Resource</b>                       | <b>Link</b>                                                                                                                                                   |
|---------------------------------------|---------------------------------------------------------------------------------------------------------------------------------------------------------------|
| P4W web page                          | <a href="https://p4work.com/">https://p4work.com/</a>                                                                                                         |
| P4W app for iOS                       | <a href="https://apps.apple.com/es/app/p4work/id1509417286">https://apps.apple.com/es/app/p4work/id1509417286</a>                                             |
| P4W app for Android                   | <a href="https://play.google.com/store/apps/details?id=com.geoslab.p4w&amp;hl=es">https://play.google.com/store/apps/details?id=com.geoslab.p4w&amp;hl=es</a> |
| P4W e-learning platform               | <a href="https://aulaonline.p4work.com/">https://aulaonline.p4work.com/</a>                                                                                   |
| P4W Youtube channel                   | <a href="https://www.youtube.com/channel/Prevent4Work">https://www.youtube.com/channel/Prevent4Work</a>                                                       |
| P4W Facebook account                  | <a href="https://www.facebook.com/Prevent4Work-558730587928229/">https://www.facebook.com/Prevent4Work-558730587928229/</a>                                   |
| P4W Linkedin profile                  | <a href="https://www.linkedin.com/company/prevent4work/">https://www.linkedin.com/company/prevent4work/</a>                                                   |
| P4W video presentation                | <a href="https://youtu.be/PNcVgohx1jw">https://youtu.be/PNcVgohx1jw</a>                                                                                       |
| P4W app videotutorial                 | <a href="https://youtu.be/M6mDbN6itlw">https://youtu.be/M6mDbN6itlw</a>                                                                                       |
| P4W e-learning platform videotutorial | <a href="https://youtu.be/S0ORsO0ECZk">https://youtu.be/S0ORsO0ECZk</a>                                                                                       |

**Supplemental table 2.** List of P4W animated educational videos with essential messages and evidence-based information related to musculoskeletal pain and work.

| # Video & Link                                                               | Title                                                                                              | Description                                                                                                                                                                                                                                                                                   | Inspired in the article                                                                                                                                                                                                                                                                                    |
|------------------------------------------------------------------------------|----------------------------------------------------------------------------------------------------|-----------------------------------------------------------------------------------------------------------------------------------------------------------------------------------------------------------------------------------------------------------------------------------------------|------------------------------------------------------------------------------------------------------------------------------------------------------------------------------------------------------------------------------------------------------------------------------------------------------------|
| 1<br><a href="https://youtu.be/7cao2oIyomg">https://youtu.be/7cao2oIyomg</a> | P4Work   Best Practices for Musculoskeletal Pain management (1): Patient-Centred Care              | <p>This is the first of three videos where you will learn about the best recommendations for addressing musculoskeletal pain in your clinical practice.</p> <p>This video is mainly intended for healthcare professionals and the general public who want to learn more about the topic.</p>  | Lin I, Wiles L, Waller R, Goucke R, Nagree Y, Gibberd M, Straker L, Maher CG, O'Sullivan PPB. What does best practice care for musculoskeletal pain look like? Eleven consistent recommendations from high-quality clinical practice guidelines: systematic review. Br J Sports Med. 2020 Jan;54(2):79-86. |
| 2<br><a href="https://youtu.be/3qBWsV_v2nM">https://youtu.be/3qBWsV_v2nM</a> | P4Work   Best Practices for Musculoskeletal Pain management (2): Clinical Screening                | <p>This is the second of three videos where you will learn about the best recommendations for addressing musculoskeletal pain in your clinical practice.</p> <p>This video is mainly intended for healthcare professionals and the general public who want to learn more about the topic.</p> | Lin I, Wiles L, Waller R, Goucke R, Nagree Y, Gibberd M, Straker L, Maher CG, O'Sullivan PPB. What does best practice care for musculoskeletal pain look like? Eleven consistent recommendations from high-quality clinical practice guidelines: systematic review. Br J Sports Med. 2020 Jan;54(2):79-86. |
| 3<br><a href="https://youtu.be/wx1OG1yRVSG">https://youtu.be/wx1OG1yRVSG</a> | P4Work   Best Practices for Musculoskeletal Pain management (3): Interventions and Recommendations | <p>This is the third of three videos where you will learn about the best recommendations for addressing musculoskeletal pain in your clinical practice.</p> <p>This video is mainly intended for healthcare professionals and the general public who want to learn more about the topic.</p>  | Lin I, Wiles L, Waller R, Goucke R, Nagree Y, Gibberd M, Straker L, Maher CG, O'Sullivan PPB. What does best practice care for musculoskeletal pain look like? Eleven consistent recommendations from high-quality clinical practice guidelines: systematic review. Br J Sports Med. 2020 Jan;54(2):79-86. |



| # Video & Link                                                               | Title                                                                                   | Description                                                                                                                                                                                                                                                                                            | Inspired in the article                                                                                                                                                                                                                                                                                                                                                                                                                                                                                              |
|------------------------------------------------------------------------------|-----------------------------------------------------------------------------------------|--------------------------------------------------------------------------------------------------------------------------------------------------------------------------------------------------------------------------------------------------------------------------------------------------------|----------------------------------------------------------------------------------------------------------------------------------------------------------------------------------------------------------------------------------------------------------------------------------------------------------------------------------------------------------------------------------------------------------------------------------------------------------------------------------------------------------------------|
| 4<br><a href="https://youtu.be/k1CAyUDr1xI">https://youtu.be/k1CAyUDr1xI</a> | P4Work   Recommendations for people suffering from Musculoskeletal Pain                 | <p>In this video you will learn about the best and updated recommendations for people having musculoskeletal pain.</p> <p>This video is intended for a public audience who want to learn more about the topic.</p>                                                                                     | <p>Lin I, Wiles L, Waller R, Goucke R, Nagree Y, Gibberd M, Straker L, Maher CG, O'Sullivan PPB. What does best practice care for musculoskeletal pain look like? Eleven consistent recommendations from high-quality clinical practice guidelines: systematic review. Br J Sports Med. 2020 Jan;54(2):79-86.</p>                                                                                                                                                                                                    |
| 5<br><a href="https://youtu.be/Bad9Wjb0hUU">https://youtu.be/Bad9Wjb0hUU</a> | P4Work   Best scientific evidence on self-management programs for chronic low back pain | <p>This video you will learn about the importance of the self-management program for chronic low back pain. It wants to teach people how to manage their pain and better-known related care decisions.</p> <p>This video is intended for a public audience who want to learn more about the topic.</p> | <p>Lin I, Wiles L, Waller R, Goucke R, Nagree Y, Gibberd M, Straker L, Maher CG, O'Sullivan PPB. What does best practice care for musculoskeletal pain look like? Eleven consistent recommendations from high-quality clinical practice guidelines: systematic review. Br J Sports Med. 2020 Jan;54(2):79-86</p> <p>Du S, Hu L, Dong J, Xu G, Chen X, Jin S, Zhang H, Yin H. Self-management program for chronic low back pain: A systematic review and meta-analysis. Patient Educ Couns. 2017 Jan;100(1):37-49</p> |

| # Video & Link                                                                          | Title                                                                | Description                                                                                                                                                                                                                                                                   | Inspired in the article                                                                                                                                                                                                                                                                                                                                                                                                                                                                                                                                                                                  |
|-----------------------------------------------------------------------------------------|----------------------------------------------------------------------|-------------------------------------------------------------------------------------------------------------------------------------------------------------------------------------------------------------------------------------------------------------------------------|----------------------------------------------------------------------------------------------------------------------------------------------------------------------------------------------------------------------------------------------------------------------------------------------------------------------------------------------------------------------------------------------------------------------------------------------------------------------------------------------------------------------------------------------------------------------------------------------------------|
| <p>6</p> <p><a href="https://youtu.be/9De7xeDATGU">https://youtu.be/9De7xeDATGU</a></p> | <p>P4Work   What everyone should know about low back pain</p>        | <p>In this video you will learn about the concept of "Low Back Pain" and related issues such as prevalence, prognosis, and evidence-based recommendations for its management.</p> <p>This video is intended for a public audience who want to learn more about the topic.</p> | <p>Hartvigsen J, Hancock MJ, Kongsted A, Louw Q, Ferreira ML, Genevay S, Hoy D, Karppinen J, Pransky G, Sieper J, Smeets RJ, Underwood M; Lancet Low Back Pain Series Working Group. What low back pain is and why we need to pay attention. Lancet. 2018 Jun 9;391(10137):2356-2367.</p> <p>Foster NE, Anema JR, Cherkin D, Chou R, Cohen SP, Gross DP, Ferreira PH, Fritz JM, Koes BW, Peul W, Turner JA, Maher CG; Lancet Low Back Pain Series Working Group. Prevention and treatment of low back pain: evidence, challenges, and promising directions. Lancet. 2018 Jun 9;391(10137):2368-2383.</p> |
| <p>7</p> <p><a href="https://youtu.be/aGEKmt81SA">https://youtu.be/aGEKmt81SA</a></p>   | <p>P4Work   Recovery expectations and prognosis in Low Back Pain</p> | <p>In this video you will learn more about how positive or negative expectations might influence return to work after a low back pain episode.</p> <p>This video is intended for a public audience who want to learn more about the topic.</p>                                | <p>Hayden JA, Wilson MN, Riley RD, Iles R, Pincus T, Ogilvie R. Individual recovery expectations and prognosis of outcomes in non-specific low back pain: prognostic factor review. Cochrane Database Syst Rev. 2019 Nov 25;2019(11):CD011284</p>                                                                                                                                                                                                                                                                                                                                                        |

| # Video & Link                                                               | Title                                                                                        | Description                                                                                                                                                                                                                                                                                                                                                                                                                                                                                                                                                    | Inspired in the article                                                                                                                                                                                                            |
|------------------------------------------------------------------------------|----------------------------------------------------------------------------------------------|----------------------------------------------------------------------------------------------------------------------------------------------------------------------------------------------------------------------------------------------------------------------------------------------------------------------------------------------------------------------------------------------------------------------------------------------------------------------------------------------------------------------------------------------------------------|------------------------------------------------------------------------------------------------------------------------------------------------------------------------------------------------------------------------------------|
| 8<br><a href="https://youtu.be/BVJy3DxURL0">https://youtu.be/BVJy3DxURL0</a> | P4Work   Workplace interventions to prevent work disability in workers on sick leave         | <p>In this video you will learn about the possible workplace interventions that can be conducted to prevent work disability in workers on sick leave.</p> <p>This video is intended for a general audience who wants to learn more about the topic. However, it is mainly meant for health professionals and persons responsible for occupational safety and health in businesses, companies, and institutions.</p>                                                                                                                                            | van Vilsteren M, van Oostrom SH, de Vet HC, Franche RL, Boot CR, Anema JR. Workplace interventions to prevent work disability in workers on sick leave. Cochrane Database Syst Rev. 2015 Oct 5;(10):CD006955.                      |
| 9<br><a href="https://youtu.be/j3Sh7AbdWVM">https://youtu.be/j3Sh7AbdWVM</a> | P4Work   Workplace interventions to reduce musculoskeletal pain in physically demanding jobs | <p>In this video you will learn about workplace interventions to rehabilitate musculoskeletal disorders among employees with physically demanding work. It is about interventions and attitudes to be taken in the workplace to improve musculoskeletal pain management and to prevent injuries.</p> <p>This video is intended for a general audience who wants to learn more about the topic. However, it is mainly meant for health professionals and persons responsible for occupational safety and health in businesses, companies, and institutions.</p> | Sundstrup E, Seeberg KGV, Bengtsen E, Andersen LL. A Systematic Review of Workplace Interventions to Rehabilitate Musculoskeletal Disorders Among Employees with Physical Demanding Work. J Occup Rehabil. 2020 Dec;30(4):588-612. |

| # Video & Link                                                                | Title                                                                                      | Description                                                                                                                                                                                                                                                                                 | Inspired in the article                                                                                                                                                                                                                                                                                 |
|-------------------------------------------------------------------------------|--------------------------------------------------------------------------------------------|---------------------------------------------------------------------------------------------------------------------------------------------------------------------------------------------------------------------------------------------------------------------------------------------|---------------------------------------------------------------------------------------------------------------------------------------------------------------------------------------------------------------------------------------------------------------------------------------------------------|
| 10<br><a href="https://youtu.be/neobG3tqmV4">https://youtu.be/neobG3tqmV4</a> | P4Work   Pain at work? Be active                                                           | In this video you will learn about different practical strategies to manage and prevent musculoskeletal pain at the workplace.<br><br>This video is intended for a public audience who want to learn more about the topic.                                                                  | The episode is inspired by the idea awarded at the first Prevent4Work Symposium held in Milan on November 15th, 2019.                                                                                                                                                                                   |
| 11<br><a href="https://youtu.be/-ncVBf5rSrU">https://youtu.be/-ncVBf5rSrU</a> | P4Work   Benefits from ergonomic interventions for musculoskeletal pain management at work | In this video you will learn about the current evidence of several ergonomic interventions intended to prevent and manage musculoskeletal pain in the upper limb and neck among office workers.<br><br>This video is intended for a public audience who want to learn more about the topic. | Hoe VC, Urquhart DM, Kelsall HL, Zamri EN, Sim MR. Ergonomic interventions for preventing work-related musculoskeletal disorders of the upper limb and neck among office workers. Cochrane Database Syst Rev. 2018 Oct 23;10(10):CD008570.                                                              |
| 12<br><a href="https://youtu.be/8yKWk2oE85A">https://youtu.be/8yKWk2oE85A</a> | P4Work   Low Back Pain Course for workers                                                  | Introduction to the course "Low Back Pain", addressed to workers for all activity sectors and occupations.                                                                                                                                                                                  |                                                                                                                                                                                                                                                                                                         |
| 13<br><a href="https://youtu.be/Vp5IwXiVu8c">https://youtu.be/Vp5IwXiVu8c</a> | P4Work   Current evidence for the treatment and management of Low Back Pain                | In this video you will learn more about the management and treatment options of Low Back Pain according to current evidence-based guidelines.<br><br>This video is intended for a public audience who want to learn more about the topic.                                                   | Foster NE, Anema JR, Cherkin D, Chou R, Cohen SP, Gross DP, Ferreira PH, Fritz JM, Koes BW, Peul W, Turner JA, Maher CG; Lancet Low Back Pain Series Working Group. Prevention and treatment of low back pain: evidence, challenges, and promising directions. Lancet. 2018 Jun 9;391(10137):2368-2383. |

| # Video & Link                                                                | Title                                                   | Description                                                                                                                                                                                                                                                                                                                                               | Inspired in the article                                                                                                                                                                                                                                                                                         |
|-------------------------------------------------------------------------------|---------------------------------------------------------|-----------------------------------------------------------------------------------------------------------------------------------------------------------------------------------------------------------------------------------------------------------------------------------------------------------------------------------------------------------|-----------------------------------------------------------------------------------------------------------------------------------------------------------------------------------------------------------------------------------------------------------------------------------------------------------------|
| 14<br><a href="https://youtu.be/iaP4YnUXRjA">https://youtu.be/iaP4YnUXRjA</a> | P4Work   Neck Pain Course for workers                   | Introduction to the "Neck Pain course", addressed to workers for all activity sectors and occupations.                                                                                                                                                                                                                                                    |                                                                                                                                                                                                                                                                                                                 |
| 15<br><a href="https://youtu.be/oDoySdozQKI">https://youtu.be/oDoySdozQKI</a> | P4Work   How to help reduce the burden of Low Back Pain | In this video you will learn about what information health providers can offer to help those patients suffering from acute or chronic low back pain.<br><br>This video is mainly intended for healthcare professionals and the general public who want to learn more about the topic.                                                                     | Lim YZ, Chou L, Au RT, Seneviwickrama KMD, Cicuttini FM, Briggs AM, Sullivan K, Urquhart DM, Wluka AE. People with low back pain want clear, consistent and personalised information on prognosis, treatment options and self-management strategies: a systematic review. J Physiother. 2019 Jul;65(3):124-135. |
| 16<br><a href="https://youtu.be/WSoWBDsQIcY">https://youtu.be/WSoWBDsQIcY</a> | P4Work   How does Low Back Pain behave?                 | In this video you will learn about the most common symptoms trajectories for low back pain. You will know about practical strategies for advising individual patients on how to behave in the presence of low back pain.<br><br>This video is mainly intended for healthcare professionals and the general public who want to learn more about the topic. | Hartvigsen J, Hancock MJ, Kongsted A, Louw Q, Ferreira ML, Genevay S, Hoy D, Karppinen J, Pransky G, Sieper J, Smeets RJ, Underwood M; Lancet Low Back Pain Series Working Group. What low back pain is and why we need to pay attention. Lancet. 2018 Jun 9;391(10137):2356-2367.                              |
| 17<br><a href="https://youtu.be/tBMjdNIZwI0">https://youtu.be/tBMjdNIZwI0</a> | P4Work   Predicting factors for Low Back Pain           | In this video you will learn about some of the factors related to positive or negative outcomes of low back pain.<br><br>This video is intended for a public audience who want to learn more about the topic.                                                                                                                                             | Hartvigsen J, Hancock MJ, Kongsted A, Louw Q, Ferreira ML, Genevay S, Hoy D, Karppinen J, Pransky G, Sieper J, Smeets RJ, Underwood M; Lancet Low Back Pain Series Working Group. What low back pain is and why we need to pay                                                                                  |

| # Video & Link                                                                | Title                                                     | Description                                                                                                                                                                                                                                   | Inspired in the article                                                                                                                                                                                                                                                            |
|-------------------------------------------------------------------------------|-----------------------------------------------------------|-----------------------------------------------------------------------------------------------------------------------------------------------------------------------------------------------------------------------------------------------|------------------------------------------------------------------------------------------------------------------------------------------------------------------------------------------------------------------------------------------------------------------------------------|
|                                                                               |                                                           |                                                                                                                                                                                                                                               | attention. Lancet. 2018 Jun 9;391(10137):2356-2367.                                                                                                                                                                                                                                |
| 18<br><a href="https://youtu.be/kXBnxSlilDA">https://youtu.be/kXBnxSlilDA</a> | P4Work   Epidemiology of Low Back Pain                    | <p>In this video you will learn about the social and economic impact of low back pain and what the evolution perspectives for the future are.</p> <p>This video is intended for a public audience who want to learn more about the topic.</p> | Hartvigsen J, Hancock MJ, Kongsted A, Louw Q, Ferreira ML, Genevay S, Hoy D, Karppinen J, Pransky G, Sieper J, Smeets RJ, Underwood M; Lancet Low Back Pain Series Working Group. What low back pain is and why we need to pay attention. Lancet. 2018 Jun 9;391(10137):2356-2367. |
| 19<br><a href="https://youtu.be/eWdm4H5yTYU">https://youtu.be/eWdm4H5yTYU</a> | P4Work   Neuroscience Education for Chronic Low Back Pain | <p>In this video you will learn about what Pain Neuroscience Education (PNE) is and why it is used.</p> <p>This video is intended for a public audience who want to learn more about the topic.</p>                                           | Tegner H, Frederiksen P, Esbensen BA, Juhl C. Neurophysiological Pain Education for Patients with Chronic Low Back Pain: A Systematic Review and Meta-Analysis. Clin J Pain. 2018 Aug;34(8):778-786.                                                                               |
| 20<br><a href="https://youtu.be/k0J08OUw8pc">https://youtu.be/k0J08OUw8pc</a> | P4Work   What is neck pain?                               | <p>In this video you will learn about what neck pain is, its classification, its prognosis, and some guidelines for neck pain management.</p> <p>This video is intended for a public audience who want to learn more about the topic.</p>     | Parikh P, Santaguida P, Macdermid J, Gross A, Eshtiaghi A. Comparison of CPG's for the diagnosis, prognosis and management of non-specific neck pain: a systematic review. BMC Musculoskelet Disord. 2019 Feb 14;20(1):81.                                                         |

| # Video & Link                                                                | Title                                                                                | Description                                                                                                                                                                                                                                                       | Inspired in the article                                                                                                                                                                                                                                                                                                                                                                                                                                                                                                                                                                                                                        |
|-------------------------------------------------------------------------------|--------------------------------------------------------------------------------------|-------------------------------------------------------------------------------------------------------------------------------------------------------------------------------------------------------------------------------------------------------------------|------------------------------------------------------------------------------------------------------------------------------------------------------------------------------------------------------------------------------------------------------------------------------------------------------------------------------------------------------------------------------------------------------------------------------------------------------------------------------------------------------------------------------------------------------------------------------------------------------------------------------------------------|
| 21<br><a href="https://youtu.be/sS-Cxg_RO7A">https://youtu.be/sS-Cxg_RO7A</a> | P4Work   What is the current evidence for the management and treatment of Neck Pain? | <p>In this video you will learn more about the management and treatment options of non-specific neck pain according to current evidence-based guidelines.</p> <p>This video is intended for a public audience who want to learn more about the topic.</p>         | <p>Sterling M, de Zoete RMJ, Coppeters I, Farrell SF. Best Evidence Rehabilitation for Chronic Pain Part 4: Neck Pain. J Clin Med. 2019 Aug 15;8(8):1219.</p> <p>Ainpradub K, Sitthipornvorakul E, Janwantanakul P, van der Beek AJ. Effect of education on non-specific neck and low back pain: A meta-analysis of randomized controlled trials. Man Ther. 2016 Apr;22:31-41.</p> <p>Miyamoto GC, Lin CC, Cabral CMN, van Dongen JM, van Tulder MW. Cost-effectiveness of exercise therapy in the treatment of non-specific neck pain and low back pain: a systematic review with meta-analysis. Br J Sports Med. 2019 Feb;53(3):172-181.</p> |
| 22<br><a href="https://youtu.be/jdUYCN6Zb64">https://youtu.be/jdUYCN6Zb64</a> | P4Work   Low Back Pain classification                                                | <p>In this video you will learn about the specific pathologies associated with low back pain and clinical presentations, indicating the risk of severe pathology.</p> <p>This video is intended for a public audience who want to learn more about the topic.</p> | <p>Henschke N, Maher CG, Ostelo RW, de Vet HC, Macaskill P, Irwig L. Red flags to screen for malignancy in patients with low-back pain. Cochrane Database Syst Rev. 2013 Feb 28;(2):CD008686.</p> <p>Premkumar A, Godfrey W, Gottschalk MB, Boden SD. Red</p>                                                                                                                                                                                                                                                                                                                                                                                  |



| # Video & Link                                                                | Title                              | Description                                                                                                                                                                                                  | Inspired in the article                                                                                                                                                                                                                                                                                                                                                                                                                                                            |
|-------------------------------------------------------------------------------|------------------------------------|--------------------------------------------------------------------------------------------------------------------------------------------------------------------------------------------------------------|------------------------------------------------------------------------------------------------------------------------------------------------------------------------------------------------------------------------------------------------------------------------------------------------------------------------------------------------------------------------------------------------------------------------------------------------------------------------------------|
|                                                                               |                                    |                                                                                                                                                                                                              | Flags for Low Back Pain Are Not Always Really Red: A Prospective Evaluation of the Clinical Utility of Commonly Used Screening Questions for Low Back Pain. J Bone Joint Surg Am. 2018 Mar 7;100(5):368-374.                                                                                                                                                                                                                                                                       |
| 23<br><a href="https://youtu.be/aJFMfwPlcrM">https://youtu.be/aJFMfwPlcrM</a> | P4Work   Living with Chronic Pain  | In this video you will learn about how to optimize lifestyle in people with chronic pain.<br><br>This video is intended for a public audience who want to learn more about the topic.                        | Parikh P, Santaguida P, Macdermid J, Gross A, Eshtiaghi A. Comparison of CPG's for the diagnosis, prognosis and management of non-specific neck pain: a systematic review. BMC Musculoskelet Disord. 2019 Feb 14;20(1):81.                                                                                                                                                                                                                                                         |
| 24<br><a href="https://youtu.be/0btt6pf6JjM">https://youtu.be/0btt6pf6JjM</a> | P4Work   Working with Chronic Pain | In this video you will learn why work is a resource that should be maintained, even if working is not pain-free.<br><br>This video is intended for a public audience who want to learn more about the topic. | Cullen KL, Irvin E, Collie A, Clay F, Gensby U, Jennings PA, Hogg-Johnson S, Kristman V, Laberge M, McKenzie D, Newnam S, Palagyi A, Ruseckaite R, Sheppard DM, Shourie S, Steenstra I, Van Eerd D, Amick BC 3rd. Effectiveness of Workplace Interventions in Return-to-Work for Musculoskeletal, Pain-Related and Mental Health Conditions: An Update of the Evidence and Messages for Practitioners. J Occup Rehabil. 2018 Mar;28(1):1-15.<br><br>Norström, F., Waenerlund, AK., |



| # Video & Link                                                                | Title                              | Description                                                                                                                                                                                                                                   | Inspired in the article                                                                                                                                                                                                                                                                                                                                                                                                                                                                                                                                                                                                        |
|-------------------------------------------------------------------------------|------------------------------------|-----------------------------------------------------------------------------------------------------------------------------------------------------------------------------------------------------------------------------------------------|--------------------------------------------------------------------------------------------------------------------------------------------------------------------------------------------------------------------------------------------------------------------------------------------------------------------------------------------------------------------------------------------------------------------------------------------------------------------------------------------------------------------------------------------------------------------------------------------------------------------------------|
|                                                                               |                                    |                                                                                                                                                                                                                                               | Lindholm, L. et al. Does unemployment contribute to poorer health-related quality of life among Swedish adults?. BMC Public Health 19, 457 (2019).                                                                                                                                                                                                                                                                                                                                                                                                                                                                             |
| 25<br><a href="https://youtu.be/QWwM9a100Oc">https://youtu.be/QWwM9a100Oc</a> | P4Work   Epidemiology of Neck Pain | <p>In this video you will learn about the social and economic impact of neck pain and what are the statistics of neck pain on a global scale.</p> <p>This video is intended for a public audience who want to learn more about the topic.</p> | <p>Safiri S, Kolahi AA, Hoy D, Buchbinder R, Mansournia MA, Bettampadi D, Ashrafi-Asgarabad A, Almasi-Hashiani A, Smith E, Sepidarkish M, Cross M, Qorbani M, Moradi-Lakeh M, Woolf AD, March L, Collins G, Ferreira ML. Global, regional, and national burden of neck pain in the general population, 1990-2017: systematic analysis of the Global Burden of Disease Study 2017. BMJ. 2020 Mar 26;368:m791.</p> <p>Hallman DM, Holtermann A, Dencker-Larsen S, et al. Are trajectories of neck-shoulder pain associated with sick leave and work ability in workers? A 1-year prospective study. BMJ Open 2019;9:e022006.</p> |

| # Video & Link                                                                | Title                                                              | Description                                                                                                                                                                                                               | Inspired in the article                                                                                                                                                                                                       |
|-------------------------------------------------------------------------------|--------------------------------------------------------------------|---------------------------------------------------------------------------------------------------------------------------------------------------------------------------------------------------------------------------|-------------------------------------------------------------------------------------------------------------------------------------------------------------------------------------------------------------------------------|
| 26<br><a href="https://youtu.be/frMTiNSf7P4">https://youtu.be/frMTiNSf7P4</a> | P4Work   How to reduce Work-related Neck Pain                      | In this video you will learn about what physical exercises can be performed using a rubber band in order to reduce neck pain.<br><br>This video is intended for a public audience who want to learn more about the topic. | Parikh P, Santaguida P, Macdermid J, Gross A, Eshtiaghi A.<br>Comparison of CPG's for the diagnosis, prognosis and management of non-specific neck pain: a systematic review. BMC Musculoskelet Disord. 2019 Feb 14;20(1):81. |
| 27<br><a href="https://youtu.be/yIqUyw526Mo">https://youtu.be/yIqUyw526Mo</a> | P4Work   Is working good for you? (1): Health, work, and wellbeing | In this video you will learn about how work, health, and wellbeing may influence each other.<br><br>This video is intended for a public audience who want to learn more about the topic.                                  | Waddell G, Burton AK. Is work good for your health and wellbeing? The Stationery Office, London, UK. (2006) ISBN 9780117036949                                                                                                |
| 28<br><a href="https://youtu.be/tIy6mqMHZhg">https://youtu.be/tIy6mqMHZhg</a> | P4Work   Is working good for you? (2): Unemployment and health     | In this video you will learn about how unemployment can actually influence our mental and physical health.<br><br>This video is intended for a public audience who want to learn more about the topic.                    | Waddell G, Burton AK. Is work good for your health and wellbeing? The Stationery Office, London, UK. (2006) ISBN 9780117036949                                                                                                |
| 29<br><a href="https://youtu.be/qKNZT3RuCa0">https://youtu.be/qKNZT3RuCa0</a> | P4Work   Is working good for you? (3): Employment and health       | In this video you will learn about the benefits that meaningful employment has on our health.<br><br>This video is intended for a public audience who want to learn more about the topic.                                 | Waddell G, Burton AK. Is work good for your health and wellbeing? The Stationery Office, London, UK. (2006) ISBN 9780117036949                                                                                                |
| 30<br><a href="https://youtu.be/ywtIBLsoQHg">https://youtu.be/ywtIBLsoQHg</a> | P4Work   Is working good for you? (4): Re-employment and health    | In this video you will learn about the therapeutic effect of getting back into the workforce after a period of unemployment.                                                                                              | Waddell G, Burton AK. Is work good for your health and wellbeing? The Stationery Office, London, UK.                                                                                                                          |

| # Video & Link                                                                | Title                                                                              | Description                                                                                                                                                                                                                                                     | Inspired in the article                                                                                                         |
|-------------------------------------------------------------------------------|------------------------------------------------------------------------------------|-----------------------------------------------------------------------------------------------------------------------------------------------------------------------------------------------------------------------------------------------------------------|---------------------------------------------------------------------------------------------------------------------------------|
|                                                                               |                                                                                    | This video is intended for a public audience who want to learn more about the topic.                                                                                                                                                                            | (2006) ISBN 9780117036949                                                                                                       |
| 31<br><a href="https://youtu.be/wLuhGLFtelw">https://youtu.be/wLuhGLFtelw</a> | P4Work   Is working good for you? (5): Therapeutic effect for Musculoskeletal Pain | In this video you will learn about the benefits of employment and re-employment for people with musculoskeletal pain and why work should be considered therapeutic.<br><br>This video is intended for a public audience who want to learn more about the topic. | Waddell G, Burton AK. Is work good for your health and well-being? The Stationery Office, London, UK. (2006) ISBN 9780117036949 |
