# Supplementary material for: European knowledge alliance for innovative measures in prevention of work-related musculoskeletal pain disorders (Prevent4Work Project): protocol for an international mixed-methods longitudinal study
Source: PubMed Central journal article supplement — BMJ Open. 2021 Sep 14;11(9):e052602. doi: 10.1136/bmjopen-2021-052602 (PMC8442076; doi:10.1136/bmjopen-2021-052602), 2021-09-14
Supplement: bmjopen-2021-052602supp001.pdf [file bmjopen-2021-052602supp001.pdf]

**Supplemental table 1.** List of P4W links resources: innovative educational programs and adaptive mobile interactive digital platforms for delivering evidence-based information and collecting data.

| <b>Resource</b>                       | <b>Link</b>                                                                                                                                                   |
|---------------------------------------|---------------------------------------------------------------------------------------------------------------------------------------------------------------|
| P4W web page                          | <a href="https://p4work.com/">https://p4work.com/</a>                                                                                                         |
| P4W app for iOS                       | <a href="https://apps.apple.com/es/app/p4work/id1509417286">https://apps.apple.com/es/app/p4work/id1509417286</a>                                             |
| P4W app for Android                   | <a href="https://play.google.com/store/apps/details?id=com.geoslab.p4w&amp;hl=es">https://play.google.com/store/apps/details?id=com.geoslab.p4w&amp;hl=es</a> |
| P4W e-learning platform               | <a href="https://aulaonline.p4work.com/">https://aulaonline.p4work.com/</a>                                                                                   |
| P4W Youtube channel                   | <a href="https://www.youtube.com/channel/Prevent4Work">https://www.youtube.com/channel/Prevent4Work</a>                                                       |
| P4W Facebook account                  | <a href="https://www.facebook.com/Prevent4Work-558730587928229/">https://www.facebook.com/Prevent4Work-558730587928229/</a>                                   |
| P4W Linkedin profile                  | <a href="https://www.linkedin.com/company/prevent4work/">https://www.linkedin.com/company/prevent4work/</a>                                                   |
| P4W video presentation                | <a href="https://youtu.be/PNcVgohx1jw">https://youtu.be/PNcVgohx1jw</a>                                                                                       |
| P4W app videotutorial                 | <a href="https://youtu.be/M6mDbN6itlw">https://youtu.be/M6mDbN6itlw</a>                                                                                       |
| P4W e-learning platform videotutorial | <a href="https://youtu.be/S0ORsO0ECZk">https://youtu.be/S0ORsO0ECZk</a>                                                                                       |
